# Supplementary material
Source: Research Square preprint supplement (doi:10.21203/rs.3.rs-9424351/v1)
Supplement: Supplementary file 1 [file be71ac37cfbbcdf9e9cf4aca.xlsx]

## Sheet:  Table S1
Table S1. The detail metabolites information in XYBT during fermentation
Index	Compounds	Class	Molecular Weight (Da)	Formula	CAS	F0-1	F0-2	F0-3	F2-1	F2-2	F2-3	F4-1	F4-2	F4-3
NEG_q99	Betulinic Acid	Terpenoids	456.7	C30H48O3	472-15-1	263542	780038	263300	229541	154162	258538	325607	362678	338433
NEG_q176	Fusidic Acid	Terpenoids	516.7	C31H48O6	6990-06-03	239444	16143.2	311366	150035	87029.9	166855	156109	198357	90873.1
NEG_q184	Ginkgolide	Terpenoids	406.4	C20H22O9	153355-70-5	1559.78	755.183	812.163	1231.4	782.77	753.614	663.015	770.526	734.224
NEG_q186	Glaucarubin	Terpenoids	496.6	C25H36O10	1448-23-3	10.0018	442.289	316.36	1306.59	10.0018	877.744	1775.85	1983.63	441.877
NEG_q192	Graniline	Terpenoids	264.3	C15H20O4	40737-97-1	9.66389e+06	8.64028e+06	6.99381e+06	5.34136e+06	4.99341e+06	5.74461e+06	6.15573e+06	6.6087e+06	6.16631e+06
NEG_q195	Hederacolchiside	Terpenoids	897.1	C47H76O16	106577-39-3	587.466	529.231	10.0018	737.013	5757.96	621.414	10.0018	1302.68	1542.22
NEG_q196	Hinokitiol	Terpenoids	164.2	C10H12O2	499-44-5	4.65898e+07	3.81273e+07	3.92751e+07	2.15041e+07	2.75632e+07	3.2763e+07	1.80065e+07	3.76829e+07	3.9225e+07
NEG_q203	Incensole	Terpenoids	306.5	C20H34O2	22419-74-5	16628.1	22662	19661.4	13181.1	11798.5	22261.1	19614.3	23323.9	8189.42
NEG_q236	Linalyl Acetate	Terpenoids	196.3	C12H20O2	115-95-7	24728.2	24247.4	41116.4	17936.4	33842.8	40569.5	26101	26206.5	22534.4
NEG_q282	Nivalenol	Terpenoids	312.1	C15H20O7	23282-20-4	1.47871e+06	1.42712e+06	1.9387e+06	1.45311e+06	2.00419e+06	3.71609e+06	1.33656e+06	1.37963e+06	2.64288e+06
NEG_q288	Oleanolic Acid	Terpenoids	456.7	C30H48O3	508-02-1	1261.87	10.0018	2125.28	10.0018	10.0018	10.0018	1270.04	821.675	4123.24
NEG_q289	Oleanonic Acid	Terpenoids	454.7	C30H46O3	17990-42-0	3377.53	772.695	10.0018	3414.24	1037.24	10.0018	4222.43	10.0018	10.0018
NEG_q311	Poricoic Acid B	Terpenoids	484.7	C30H44O5	137551-39-4	6329.23	10.0018	10.0018	10.0018	604.092	10.0018	10.0018	4612.4	10.0018
NEG_q314	Procurcumenol	Terpenoids	234.3	C15H22O2	21698-40-8	8.85413e+06	6.53607e+06	7.33628e+06	1.03576e+07	1.04158e+07	9.73421e+06	9.58754e+06	9.74103e+06	9.57672e+06
NEG_q317	Pseudolaric Acid	Terpenoids	388.4	C22H28O6	82508-32-5	317.295	654.751	316.948	10.0018	317.58	356.252	319.353	348.916	657.775
NEG_q335	Safranal	Terpenoids	150.2	C10H14O	116-26-7	39731	40297.6	29793.3	45064.8	29539.4	39236	58632.2	57800	53132
NEG_q341	Sclareol	Terpenoids	308.5	C20H36O2	515-03-7	9.85304e+06	1.36742e+07	7.72903e+06	9.43064e+06	1.13116e+07	9.96673e+06	1.75224e+07	8.52202e+06	1.41426e+07
NEG_q368	Tulipalin	Terpenoids	98.1	C5H6O2	547-65-9	2.60029e+06	1.0652e+06	1837214	4784971	9.07332e+06	1.3068e+06	1477970	1.53654e+06	1570389
NEG_q376	Ursonic Acid	Terpenoids	454.7	C30H46O3	6246-46-4	2135.31	10.0018	10.0018	2310.32	1692.4	10.0018	3566.64	10.0018	1554.77
NEG_q384	β-Amyrin	Terpenoids	426.7	C30H50O	559-70-6	10668.5	14573.3	11441.4	8902.61	7519.1	11818.8	10957.9	7812.11	10.0018
POS_q63	6-Benzoylheteratisine	Terpenoids	495.6	C29H37NO6	99759-48-5	1973.03	3290.58	2196.67	4238.98	10.0018	10.0018	1094.38	4135.37	10.0018
POS_q74	7-O-Methylrosmanol	Terpenoids	360.4	C21H28O5	113085-62-4	573.953	10.0018	10.0018	1260.79	607.245	10.0018	2183.54	2117.45	476.915
POS_q77	8-O-Acetylharpagide	Terpenoids	406.4	C17H26O11	6926-14-3	566.176	3710.68	10.0018	1149.94	1154.2	1164.65	1720.9	2745.47	1632.01
POS_q94	Alpha-Zearalenol	Terpenoids	320.2	C18H24O5	36455-72-8	403845	199106	14392.8	282553	150729	571891	79342	73780	75804
POS_q100	Asperuloside	Terpenoids	414.4	C18H22O11	14259-45-1	6.92073e+06	2.04937e+06	1.03428e+07	1.01216e+07	9223577	9.0642e+06	1.05164e+07	5.65824e+06	4.50151e+06
POS_q106	Bardoxolone	Terpenoids	491.7	C31H41NO4	218600-44-3	1773.63	10.0018	2459.9	10.0018	10.0018	10.0018	1645.3	945.708	1581.92
POS_q118	Bruceine B	Terpenoids	480.2	C23H28O11	25514-29-8	11751	11581.5	1849.52	9541.38	9575.59	10077	16211.4	7383.68	11411
POS_q128	Cauloside D	Terpenoids	1075.2	C53H86O22	12672-45-6	10.0018	10.0018	3222.41	10.0018	383.241	10.0018	1009.53	1090.8	10.0018
POS_q160	Deoxylimonin	Terpenoids	454.5	C26H30O7	989-23-1	10.0018	10.0018	960.867	10.0018	3701.74	10.0018	7972.8	904.507	4604.57
POS_q193	Ergolide	Terpenoids	306.4	C17H22O5	54999-07-4	967.612	7374.03	5703.16	959.621	910.916	4589.33	8544.01	10.0018	906.151
POS_q194	Erythrodiol	Terpenoids	442.7	C30H50O2	545-48-2	1766.93	10.0018	10.0018	1767.1	1767.09	10.0018	883.533	10.0018	4417.76
POS_q197	Eucamalol	Terpenoids	168.2	C10H16O2	145544-91-8	1065.7	2041.06	6351.31	559.176	836.092	662.43	553.386	1789.77	10.0018
POS_q198	Eucannabinolide	Terpenoids	420.2	C22H28O8	38458-58-1	23572.1	19248.7	15872.1	13909.5	14066.5	15378.2	19321.8	19941.1	24332.2
POS_q199	(E)-β-Farnesene	Terpenoids	204.3	C15H24	18794-84-8	961.415	10.0018	10.0018	1951.86	10.0018	1933.29	1920.4	955.516	959.409
POS_q209	Ganoderic Acid L	Terpenoids	534.3	C30H46O8	102607-24-9	1.9942e+06	2.29643e+06	2.5266e+06	2.60068e+06	1.39665e+06	2.2725e+06	2.8684e+06	3.11412e+06	2.64062e+06
POS_q212	(+)-Glaucarubinone	Terpenoids	494.2	C25H34O10	1259-86-5	132974	40789.7	59370.9	19256	66873.8	65984.2	120120	33297.3	73003.4
POS_q218	Hastatoside	Terpenoids	404.4	C17H24O11	50816-24-5	1437.51	1818.83	10.0018	2953.19	10.0018	5646.88	3880.34	3358.94	10.0018
POS_q224	Homobaldrinal	Terpenoids	260.1	C15H16O4	67910-07-0	344693	422774	332561	260092	247027	244083	267297	269487	255851
POS_q227	Hosenkoside C	Terpenoids	979.1	C48H82O20	156764-83-9	10.0018	1063.64	10.0018	10.0018	10.0018	1057.39	1112.46	10.0018	10.0018
POS_q239	Isocurcumenol	Terpenoids	234.3	C15H22O2	24063-71-6	9755.45	10.0018	4532.7	1424.27	6681.24	7144.83	12205.2	11868	11367
POS_q251	Karounidiol	Terpenoids	440.4	C30H48O2	118117-31-0	10.0018	3675.33	2837.12	3438.45	10.0018	3170.01	2005.74	3898.2	10.0018
POS_q272	Levomenol	Terpenoids	222.4	C15H26O	23089-26-1	1179.19	10.0018	10.0018	10.0018	6212.8	4330.09	10.0018	3480.58	3190.91
POS_q281	Limonexic Acid	Terpenoids	502.2	C26H30O10	99026-99-0	37980.4	52257.1	46770.6	41365.1	13448.4	7283.24	78947.2	59309	32695.6
POS_q302	Maoecrystal	Terpenoids	388.4	C22H28O6	96850-30-5	6183.63	18557.8	2153.96	18558.1	883.547	7952.49	10.0018	12371.3	1767.1
POS_q304	Marrubiin	Terpenoids	332.4	C20H28O4	465-92-9	10.0018	10.0018	1797.88	725.048	10.0018	10.0018	756.694	10.0018	10.0018
POS_q309	Methyl Deacetylasperulosidate	Terpenoids	404.4	C17H24O11	52613-28-2	10.0018	10.0018	3391.4	10.0018	491.932	2897.79	978.859	1191.92	10.0018
POS_q316	Microhelenin	Terpenoids	346.4	C20H26O5	63569-07-3	10.0018	1386.26	10.0018	10.0018	8993.3	1660.2	10.0018	10.0018	1637.07
POS_q364	Picroside	Terpenoids	492.5	C24H28O11	27409-30-9	3761.29	10.0018	2208.65	3255.94	872.578	10.0018	10.0018	2225	10.0018
POS_q369	Podocarpic Acid	Terpenoids	274.4	C17H22O3	5947-49-9	10.0018	701.406	10.0018	10.0018	529.731	1037.48	5496.85	1221.38	684.188
POS_q372	Pristimerin	Terpenoids	464.6	C30H40O4	1258-84-0	892.408	2563.63	8009.01	10.0018	10.0018	3625.83	1767.07	1767.08	889.167
POS_q380	Pyrocurzerenone	Terpenoids	212.3	C15H16O	20013-75-6	917.533	10.0018	2501.53	637.504	1672.18	2529.43	10.0018	10.0018	384.955
POS_q393	Ruscogenin	Terpenoids	430.6	C27H42O4	472-11-7	371154	177162	529892	335067	1.04415e+06	707306	968074	289884	675887
POS_q412	Spiramine A	Terpenoids	399.2	C24H33NO4	114531-28-1	10059.9	11830.9	10345	15382.9	3628.09	3560.64	7006.3	17190.7	10083.7
POS_q416	Sweroside	Terpenoids	358.3	C16H22O9	14215-86-2	10353.2	9476.8	21069.8	16589	11906	8968.27	10765.9	10.0018	5963
POS_q429	Toosendanin	Terpenoids	574.6	C30H38O11	58812-37-6	1766.93	14154.9	10.0018	6369.54	1065.95	10605.1	1188.09	10.0018	15039
POS_q446	Verbenalin	Terpenoids	388.4	C17H24O10	548-37-8	309716	473362	341224	445875	383371	415548	469707	427802	416798
POS_q454	Zeorin	Terpenoids	444.4	C30H52O2	22570-53-2	467978	473531	582966	661686	432611	516254	684253	635448	486121
NEG_t1172	Dulcioic acid	Terpenoids	456.7	C7H12O8	78516-69-5	2428.3	2245.68	2351.35	3918.54	3995.71	3846.77	3190.79	3090.59	3117.9
NEG_t230	Citroside A	Terpenoids	386.2	C19H30O8	120330-44-1	15154.7	13468.6	12387.9	12912.4	14015.2	13396	13218.8	12734	12824.2
NEG_t346	Camellioside C	Terpenoids	1087.2	C53H82O23	380303-68-4	7600.4	5402.95	6347.09	6483.48	7363.15	5919.26	7549.81	6129.5	6664.28
NEG_t359	Mesendanin K	Terpenoids	468.3	C30H44O4	--	4400.88	4144.54	4914.68	3863.89	3889.94	3951.15	4600.55	4576.6	4548.93
NEG_t361	bunkankasaponine C	Terpenoids	1157.3	C57H88O24	97380-26-2	5009.68	9785.66	3062.67	4591.15	5005.56	3706.6	5894.38	2746.28	3457.39
NEG_t37	Jasminoside H	Terpenoids	492.2	C22H36O12	1033721-36-6	7401.01	7270.15	7094.84	7452.85	6879.69	6029.46	5867.31	5968.98	6575.81
NEG_t371	Yemuoside I	Terpenoids	1175.3	C57H90O25	137682-17-8	64928.2	80511.3	43692.9	79417.6	61545	61061.6	65541.3	54306.4	74521.5
NEG_t405	Polyporusterone C	Terpenoids	476.6	C27H42O6	141360-90-9	5502.01	6146.2	7568.89	4405.53	4342.72	4341.56	3983.76	4757.23	4284.81
NEG_t431	Theasaponin G1	Terpenoids	1173.3	C57H88O25	929877-81-6	44553.8	59016.1	128762	75117.4	102042	61862.1	57577.8	55877.9	67240.1
NEG_t455	Ardisiacrispin B	Terpenoids	1075.3	C53H86O22	112766-96-8	4491.52	4671.01	4023.88	4565.9	4951.33	4682.34	5743.25	5589.83	5053.64
NEG_t484	deacetylvitexilactone	Terpenoids	336.5	C20H32O4	885069-79-4	1677.22	4875.53	824.529	2664.59	3257.66	1125.84	4094.09	356.682	3026.13
NEG_t486	Centellasaponin B	Terpenoids	828.5	C42H68O16	--	38418.7	30838.3	41094.8	24668.6	23410.3	26055.2	27794.5	33412.7	26979.3
NEG_t492	Momordicoside K	Terpenoids	648.9	C37H60O9	81348-84-7	1585.95	1588.01	1530.29	801.591	631.681	1688.78	2056.51	3391.75	3252.05
NEG_t51	Uralsaponin S	Terpenoids	971.1	C48H74O20	1616062-84-0	10054.7	9550.09	11802.8	9673.81	12698.3	9791.47	9974.8	7955.88	10062.7
NEG_t510	melilotoside B1	Terpenoids	753	C41H68O12	1262860-90-1	145124	157312	153781	135360	115732	122931	151371	166557	138580
NEG_t511	Kuguaglycoside C	Terpenoids	616.4	C36H56O8	1041631-93-9	16024.3	14987.7	17193.9	14791.7	13819.4	13817.8	14655.4	17162.3	15079.5
NEG_t540	fischeroside A	Terpenoids	552.6	C28H40O11	1307257-07-3	5369.65	17243.9	22123.8	14141.1	12772.9	16049.3	20990.7	22791.6	18244.3
NEG_t690	Taxagifine	Terpenoids	696.7	C37H44O13	81489-69-2	599.25	2864.8	2791.22	3373.03	2870.69	3549.39	2939.7	2763.72	2738.71
NEG_t817	Cucumegastigmane I	Terpenoids	240.3	C13H20O4	929881-46-9	5122.16	4928.16	5786.97	5164.78	4833.43	5519.13	6253.56	6060.08	5787.84
NEG_t877	Cyaonoside A	Terpenoids	1103.2	C54H86O23	110081-91-9	20403.8	23091.9	20925.2	23323.2	24147.8	19400.4	23679.6	23327	24946.8
NEG_t925	Linichlorin A	Terpenoids	382.8	C19H23ClO6	62462-98-0	31034.1	28475.6	29490	34193.1	30707.9	27014.5	29711.9	29473.4	33562.3
NEG_t974	Tectoroside	Terpenoids	588.6	C30H36O12	124960-89-0	10.0018	10.0018	10.0018	10.0018	10.0018	10.0018	4830.53	10.0018	10.0018
POS_t134	Geranylhydroquinone	Terpenoids	246.3	C16H22O2	10457-66-6	80187.6	82712.9	72264.4	83827.3	73943.9	73545.4	75778.7	78214.8	73991.8
POS_t217	Gentiournoside D	Terpenoids	512.5	C23H28O13	157722-21-9	267.532	232.289	260.792	320.518	201.92	266.493	291.37	263.879	222.613
POS_t240	Niveusin A	Terpenoids	394.4	C20H26O8	75680-26-1	1628.41	1597.33	1460.79	1510.05	1087.6	1584.23	1507.76	1722.53	1612.6
POS_t274	methyl botryaloate	Terpenoids	298.4	C16H26O5	75207-23-7	6342.84	6463.03	7310.67	5063.75	3550.6	5172.88	5825.78	7136.74	5418.3
POS_t298	10-Hydroxy-2-decenoic acid	Terpenoids	186.2	C10H18O3	765-01-5	398.241	287.441	379.194	249.081	182.306	236.366	339.777	398.939	257.536
POS_t312	metacridamides B	Terpenoids	567.8	C35H53NO5	1356937-11-5	30209.7	36074.1	35675.9	48897.9	42220.9	24093.3	22782.1	26123.5	32388.6
POS_t431	Odoratone	Terpenoids	472.7	C30H48O4	16962-90-6	1565.35	1350.08	1155.55	921.293	744.556	803.544	932.556	1084.74	777.566
POS_t453	Taxinine	Terpenoids	606.7	C35H42O9	3835-52-7	3.0262e+07	4.80412e+07	4.95345e+07	4.90519e+07	4.43307e+07	4.68533e+07	4.76057e+07	4.87458e+07	4.4657e+07
POS_t473	Ketohakonanol	Terpenoids	428.7	C29H48O2	18004-20-1	8159.58	7345.31	7341.06	8912.44	7550.38	8439.77	9729.33	9056.76	4343.39
POS_t488	Kankanoside P	Terpenoids	346.2	C16H26O8	--	30972	32854.4	28798.8	33129.3	20884.1	28069.2	26385.4	23058	12665.4
POS_t49	Chloramultilide D	Terpenoids	636.7	C35H40O11	1000995-49-2	232478	610393	628552	422793	311436	481092	574551	652864	340420
POS_t502	aster saponin	Terpenoids	780.9	C41H64O14	142784-40-5	104773	121954	114358	102745	132128	101990	120082	131636	105883
POS_t508	hydrangenoside	Terpenoids	620.6	C31H40O13	74565-24-5	215651	659790	647587	527318	445807	550229	592203	625176	484458
POS_t515	Dehydroflexixanthin	Terpenoids	580.8	C40H52O3	38715-25-2	2210.78	1708.62	2392.52	739.665	1227.15	747.732	1037.9	1260.37	961.078
POS_t660	Berneuxia saponin C	Terpenoids	1119.2	C54H86O24	214359-10-1	23037.3	25902	24141.1	26632.5	24997.8	22214.1	29671.8	28131.1	30065.3
POS_t676	Euscaphin B	Terpenoids	258.4	C14H26O4	956869-95-7	476.122	595.615	582.065	277.767	259.308	300.356	344.268	397.327	358.785
POS_t705	Pungiolide A	Terpenoids	508.6	C29H34O8	130395-54-9	1326.98	1347.85	1247.15	1171.28	894.464	1000.17	1111.97	1237.79	1171.75
POS_t739	Oleuropeinic acid	Terpenoids	570.5	C25H30O15	96382-90-0	1369.51	1190.47	1178.42	3060.6	2992.66	3397.55	3133.89	3249.93	3742.58
POS_t768	Yadanzioside F	Terpenoids	642.6	C29H38O16	95258-11-0	515.491	467.213	452.454	492.604	447.992	495.822	510.916	517.666	451.447
POS_t853	Demethylisoalangiside	Terpenoids	491.5	C24H29NO10	--	831.811	922.428	656.996	705.072	640.296	629.357	804.497	781.927	772.938
POS_t86	Gentiopicroside	Terpenoids	356.1	C16H20O9	20831-76-9	4539.66	4317.51	3929.94	3249.36	2921.8	3063.94	3983.16	4080.83	3739.97
NEG_q66	8-Prenylnaringenin	Flavonoids	340.4	C20H20O5	53846-50-7	889.272	704.482	842.716	10.0018	10.0018	10.0018	10.0018	199.721	10.0018
NEG_q87	Apigenin	Flavonoids	270.2	C15H10O5	520-36-5	4.38165e+06	3.82415e+06	4.58251e+06	2.98634e+06	3.05365e+06	3.70845e+06	4.34154e+06	4.92553e+06	4.16415e+06
NEG_q100	Biochanin A	Flavonoids	284.3	C16H12O5	491-80-5	95942	96586.4	105940	219389	227620	301834	287429	360429	303555
NEG_q107	Catechin	Flavonoids	290.3	C15H14O6	154-23-4	1.88097e+06	1845855	2.09589e+06	1.68939e+06	1.65683e+06	1.72121e+06	1.82721e+06	1.74686e+06	1.98753e+06
NEG_q109	(±)-Catechin Hydrate	Flavonoids	290.3	C15H14O6	7295-85-4	1.45243e+06	1716157	1.78171e+06	1.44234e+06	1.21373e+06	1.18604e+06	1.5958e+06	1.65264e+06	1.679e+06
NEG_q116	Cynaroside	Flavonoids	448.4	C21H20O11	5373-11-05	2.41082e+07	2.85514e+07	2.54292e+07	2.53663e+07	2.14546e+07	1.93646e+07	2.5937e+07	2.37061e+07	2.05695e+07
NEG_q133	Dihydrobaicalein	Flavonoids	272.3	C15H12O5	35683-17-1	1.53154e+07	1.82077e+07	1.66147e+07	1.60487e+07	1.30528e+07	1.27282e+07	1.83054e+07	1.707e+07	1.7681e+07
NEG_q135	Dihydrokaempferol	Flavonoids	288.2	C15H12O6	480-20-6	5.00794e+06	5.54395e+06	4.52503e+06	6.43145e+06	4.94778e+06	4.2422e+06	6.32785e+06	5.65915e+06	6.29002e+06
NEG_q138	Diosmetin	Flavonoids	300.3	C16H12O6	520-34-3	4.50811e+06	3.04253e+06	4.11667e+06	2.45527e+06	2.52145e+06	2.68866e+06	3.21879e+06	3.43973e+06	3.19727e+06
NEG_q182	Genistein	Flavonoids	270.2	C15H10O5	446-72-0	10.0018	10.0018	10.0018	10.0018	10.0018	10.0018	10.0018	10.0018	10.0018
NEG_q185	Glabrone	Flavonoids	336.3	C20H16O5	60008-02-8	8050.87	12029.5	5990.57	6107.53	2921.91	5857.58	6239.21	6545.79	4934.53
NEG_q197	Hispidulin	Flavonoids	300.3	C16H12O6	1447-88-7	988028	577076	739692	569254	566110	544340	706748	690285	692051
NEG_q198	Homoeriodictyol	Flavonoids	302.3	C16H14O6	446-71-9	816185	821148	804334	638063	640981	596686	4.4818e+06	4051705	4535987
NEG_q200	Hyperoside	Flavonoids	464.4	C21H20O12	482-36-0	5.28767e+07	2.22957e+07	5.74671e+07	4.46726e+07	4.51352e+07	1.6524e+07	5.25712e+07	1.84517e+07	4.34098e+07
NEG_q210	Iristectorigenin A	Flavonoids	330.3	C17H14O7	39012-01-6	2.32604e+07	1.64047e+07	1.76051e+07	1.46312e+07	1.70814e+07	1.83481e+07	2.14302e+07	2.42618e+07	2.04831e+07
NEG_q216	Isoliquiritin	Flavonoids	418.4	C21H22O9	5041-81-6	444629	409339	420248	450483	413294	419820	439388	535305	460012
NEG_q218	Isoquercitrin	Flavonoids	464.4	C21H20O12	21637-25-2	1.19461e+08	1.21031e+08	1.27116e+08	1.00704e+08	9.33209e+07	9.13771e+07	1.02599e+08	1.08004e+08	1.01774e+08
NEG_q219	Isovitexin	Flavonoids	432.4	C21H20O10	38953-85-4	1.49997e+07	9.01325e+06	1.20327e+07	8.2099e+06	1.342e+07	9.50327e+06	1.16357e+07	1.19933e+07	1.2801e+07
NEG_q222	Kaempferol	Flavonoids	286.2	C15H10O6	520-18-3	1.43211e+06	1.32796e+06	1.30982e+06	2.92749e+06	2.53653e+06	2.84448e+06	2.84076e+06	3.32648e+06	3.02004e+06
NEG_q223	Kaempferol 3-Glucorhamnoside	Flavonoids	594.5	C27H30O15	40437-72-7	3.56095e+07	4.208e+07	3.25833e+07	3.41589e+07	3.28609e+07	3.20022e+07	3.84759e+07	4.0496e+07	3.70387e+07
NEG_q244	Lucidone	Flavonoids	256.3	C15H12O4	19956-53-7	79419.2	83827.1	87231.7	70618	53174.4	37108.2	65823.8	99632.9	76995.3
NEG_q265	Methylophiopogonanone B	Flavonoids	328.4	C19H20O5	74805-91-7	408.835	10.0018	298.632	10.0018	300.413	775.854	403.826	10.0018	10.0018
NEG_q270	Morin	Flavonoids	302.2	C15H10O7	480-16-0	4.533e+06	5.23323e+06	4.45484e+06	8.23138e+06	6.95521e+06	7.81985e+06	1.02185e+07	9.53308e+06	8.82077e+06
NEG_q272	Myricitrin	Flavonoids	464.4	C21H20O12	17912-87-7	42835.7	71337.3	65360.8	63031.4	56946.8	27950.4	27675.5	30242	30372
NEG_q277	Narcissin	Flavonoids	624.5	C28H32O16	604-80-8	245626	236226	237448	235907	261239	207456	175859	205948	232831
NEG_q278	(±)-Naringenin	Flavonoids	272.2	C15H12O5	67604-48-2	1.96515e+07	2.20325e+07	2.1561e+07	2.04888e+07	1.87654e+07	1.67844e+07	2.57238e+07	2.4512e+07	2.33585e+07
NEG_q279	Naringenin Chalcone	Flavonoids	272.2	C15H12O5	73692-50-9	9.28622e+06	8502157	8.63405e+06	2.15654e+06	8.38578e+06	7.72848e+06	1.15183e+07	1.18215e+07	1.08076e+07
NEG_q280	Naringin	Flavonoids	580.5	C27H32O14	10236-47-2	689984	491394	649012	622776	597468	668782	926507	633532	1.2552e+06
NEG_q302	Phloretin	Flavonoids	274.3	C15H14O5	60-82-2	309865	263371	344544	194153	260614	206353	232174	307411	295409
NEG_q303	Phlorizin	Flavonoids	436.4	C21H24O10	60-81-1	549332	622175	648363	566753	591808	593411	750994	650426	744309
NEG_q306	Pinocembrin	Flavonoids	256.2	C15H12O4	480-39-7	88102.1	85589.1	101083	73861.7	75806.4	68944.5	97527.1	84322.8	89329
NEG_q310	Plantagoside	Flavonoids	466.4	C21H22O12	78708-33-5	2.54846e+06	2.66196e+06	2.77727e+06	1.78917e+06	1.79293e+06	1.47256e+06	1.78359e+06	1.83951e+06	1.67015e+06
NEG_q312	Pratensein	Flavonoids	300.3	C16H12O6	2284-31-3	6.94264e+06	5.0241e+06	6.28149e+06	3.80515e+06	4.15021e+06	4.09877e+06	5.05496e+06	5.26323e+06	4.64638e+06
NEG_q320	Quercetin-1	Flavonoids	302.2	C15H10O7	117-39-5	4.37386e+06	5.17561e+06	4.25041e+06	7.65697e+06	6.69187e+06	7.04798e+06	9.01172e+06	8.94047e+06	8.66342e+06
NEG_q322	Quercitrin	Flavonoids	448.4	C21H20O11	522-12-3	1.2818e+06	2.66399e+06	1.80986e+06	1.68066e+06	1.11508e+06	1.07417e+06	1.17751e+06	976352	1.5659e+06
NEG_q326	Rhamnazin	Flavonoids	330.3	C17H14O7	552-54-5	2.36481e+07	1.65632e+07	2.18002e+07	1.72805e+07	2.01482e+07	1.99569e+07	2.47526e+07	2.70865e+07	2.38457e+07
NEG_q330	Robinetinidin Chloride	Flavonoids	322.7	C15H11ClO6	3020-09-05	174694	103300	54357.4	174012	129912	124820	218253	186219	181874
NEG_q338	Saponaretin	Flavonoids	432.4	C21H20O10	29702-25-8	2.68292e+07	3.02255e+07	2.9843e+07	2.77113e+07	3.24759e+07	2.47729e+07	1.85306e+07	5.74449e+06	2.216e+07
NEG_q340	Schaftoside	Flavonoids	564.5	C26H28O14	51938-32-0	3.31016e+07	2.77405e+07	3.18485e+07	3.18783e+07	3.43598e+07	3.30286e+07	4.26721e+07	3.96261e+07	3.9907e+07
NEG_q360	Tiliroside	Flavonoids	594.5	C30H26O13	20316-62-5	3.81331e+07	2.74762e+07	2.89027e+07	3.0792e+07	3.12263e+07	2.31475e+07	3.05952e+07	3.3282e+07	3.10718e+07
NEG_q367	Tricetin	Flavonoids	302.2	C15H10O7	520-31-0	614036	3.00034e+06	507157	590677	420610	323856	453976	430873	335773
NEG_q379	Vincetoxicoside B	Flavonoids	448.4	C21H20O11	22007-72-3	1.00583e+07	1.10867e+07	8.63988e+06	8.00557e+06	9.92339e+06	9.63861e+06	8.14276e+06	8.89968e+06	7.36127e+06
POS_q49	5,7-Dihydroxyisoflavone	Flavonoids	241.1	C15H15NO2	61-68-7	266088	645797	541094	318118	294694	375501	369090	520925	418160
POS_q51	5-Desmethylsinensetin	Flavonoids	358.3	C19H18O7	21763-80-4	214955	195131	222936	175953	158422	156509	182379	177631	167765
POS_q59	6,7,4'-Trihydroxyisoflavone	Flavonoids	270.2	C15H10O5	17817-31-1	492150	141306	333846	252564	300376	276496	218707	180215	244112
POS_q65	6-Methylflavone	Flavonoids	236.3	C16H12O2	29976-75-8	31063	28809.6	26445	23093.6	21885.4	23896	155318	52884.3	150449
POS_q68	7,4'-Dihydroxyflavone	Flavonoids	254.2	C15H10O4	2196-14-7	71756.4	37569.2	63573.3	39071	32196.8	42092.7	13555	44077.8	34010.3
POS_q102	Astilbin	Flavonoids	450.4	C21H22O11	29838-67-3	5058.65	2227.43	5430.43	10.0018	10.0018	10.0018	10.0018	4419.07	10.0018
POS_q105	Avicularin	Flavonoids	434.4	C20H18O11	572-30-5	71007.6	84593	45863	37259.2	29953.2	40741.1	40005.8	61259.4	39144.5
POS_q129	Cedeodarin	Flavonoids	334.1	C16H14O8	31076-39-8	1.14018e+06	1.20492e+06	1.11822e+06	1.2144e+06	1.29311e+06	1.07976e+06	1.32527e+06	1.25391e+06	1.34789e+06
POS_q134	Chrysoeriol	Flavonoids	300.3	C16H12O6	491-71-4	1.33301e+06	970768	1.12287e+06	591586	628729	679708	956663	845141	878071
POS_q148	Cupressuflavone	Flavonoids	538.1	C30H18O10	3952-18-9	140071	88460.4	73015.2	77520.5	65506.4	92869.8	148760	110601	92229.8
POS_q165	Dichotomitin	Flavonoids	358.3	C18H14O8	88509-91-5	29952.3	127767	85578.2	62114.6	88902.9	76847.8	132668	78629.8	118639
POS_q166	Didymin	Flavonoids	594.6	C28H34O14	14259-47-3	1.21332e+06	1.116e+06	959033	579186	533911	532335	1.4014e+06	947170	978055
POS_q170	Diosmin	Flavonoids	608.5	C28H32O15	520-27-4	80254.5	9899.64	36518.9	46453.9	42663	37950.8	60193.7	47536.9	59198
POS_q192	(-)-Epigallocatechin	Flavonoids	306.3	C15H14O7	970-74-1	1.07787e+06	2.6309e+06	1.4898e+06	1.05148e+06	743028	813176	956386	1.24002e+06	934986
POS_q204	Flavonol	Flavonoids	238.2	C15H10O3	577-85-5	19813.4	11308.4	14219	14015.1	19191.5	4231.01	5656.2	11633.7	11327.1
POS_q214	Guaijaverin	Flavonoids	434.4	C20H18O11	22255-13-6	10.0018	6259.18	2507.06	3268.68	5536.88	9883.09	6316.23	3268.92	1767.1
POS_q237	Iristectorin A	Flavonoids	492.4	C23H24O12	37744-61-9	615724	793741	886082	310648	199272	284777	376133	395359	271804
POS_q243	Isoquercetin	Flavonoids	464.4	C21H20O12	482-35-9	4.67179e+06	3.84549e+06	4485167	2680288	2.5837e+06	2.64764e+06	10.0018	10.0018	10.0018
POS_q246	Jaceosidin	Flavonoids	330.3	C17H14O7	18085-97-7	909320	1.05702e+06	1.00227e+06	751449	857637	1.02922e+06	1.16572e+06	1.25947e+06	1.21223e+06
POS_q248	Kaempferitrin	Flavonoids	578.5	C27H30O14	482-38-2	304413	218982	246991	167717	153145	177159	165910	148628	207485
POS_q250	Kaempferol 3-Neohesperidoside	Flavonoids	594.5	C27H30O15	32602-81-6	6.81762e+06	8.65387e+06	6.29342e+06	8.32869e+06	4.52586e+06	4.56403e+06	6.07682e+06	6.25531e+06	6.40399e+06
POS_q268	Leucocyanidin	Flavonoids	306.3	C15H14O7	480-17-1	3039.34	883.538	984.103	10.0018	2512.37	3861.62	1065.91	10.0018	10.0018
POS_q288	Lonicerin	Flavonoids	594.5	C27H30O15	25694-72-8	3.11855e+06	3.6694e+06	3.3092e+06	4.05187e+06	2.08939e+06	1.99842e+06	2.66566e+06	2.93261e+06	3.31923e+06
POS_q297	Lysionotin	Flavonoids	344.3	C18H16O7	152743-19-6	33859.7	43834.3	56904.9	45596.7	56976.6	48313.7	48859.6	67877.6	61201
POS_q318	Moracin C	Flavonoids	310.1	C19H18O4	69120-06-5	73382	69538.8	111744	27757.1	55837.8	46072.6	84522	102104	98321.8
POS_q336	Neoglycyrol	Flavonoids	366.4	C21H18O6	23013-84-5	57609.1	87190.7	100385	53942.7	34878.1	35756.6	68355	44047.3	53579.6
POS_q351	Orientin	Flavonoids	448.4	C21H20O11	28608-75-5	702307	842866	689688	420467	422861	465929	574525	557107	482414
POS_q394	Rutin	Flavonoids	610.5	C27H30O16	153-18-4	253778	249865	243339	180129	196539	191191	112368	112259	121306
POS_q396	Safflor Yellow A	Flavonoids	594.2	C27H30O15	85532-77-0	1.38378e+06	1.06448e+06	1.06915e+06	641895	882846	1.1536e+06	1.29321e+06	988105	1.16191e+06
POS_q398	Salvigenin	Flavonoids	328.3	C18H16O6	19103-54-9	746.708	373.41	10.0018	10.0018	4103.46	1417.82	10.0018	1449.83	295.882
POS_q399	Saponarin	Flavonoids	594.5	C27H30O15	20310-89-8	4.28793e+06	3.66347e+06	4.00391e+06	2.8596e+06	2.16958e+06	2.19903e+06	3.5667e+06	2.98387e+06	3.15033e+06
POS_q408	Skullcapflavone Ii	Flavonoids	374.4	C19H18O8	55084-08-7	5793.13	2596.14	4930.21	2884.45	8029.4	1865.04	4623.51	5800.81	1317.02
POS_q411	Spiraeoside	Flavonoids	464.4	C21H20O12	20229-56-5	3104857	2.82719e+06	2698288	8.0191e+06	1.60125e+06	4883355	2560369	2898168	2.81741e+06
POS_q419	Tectorigenin	Flavonoids	300.3	C16H12O6	548-77-6	842554	637769	600544	426539	524289	546354	628313	618295	451945
POS_q422	Tetramethylkaempferol	Flavonoids	342.3	C19H18O6	16692-52-7	127327	125241	139662	122791	76393.1	143989	176144	149759	157177
POS_q425	Theaflavin	Flavonoids	564.5	C29H24O12	4670-05-07	1.83163e+06	1.72944e+06	1.6704e+06	1.12099e+06	898745	888604	1.01807e+06	1.08661e+06	1.1883e+06
POS_q441	Typhaneoside	Flavonoids	770.7	C34H42O20	104472-68-6	10.0018	10.0018	3164.88	10.0018	10.0018	600.034	4040.94	10.0018	10.0018
POS_q450	Vitexin	Flavonoids	432.4	C21H20O10	3681-93-4	1.83172e+07	1.38284e+07	1.41627e+07	1.0215e+07	1.2563e+07	1.15907e+07	14022906	1.45721e+07	1.38584e+07
NEG_t249	Dehydrotoxicarol	Flavonoids	408.4	C23H20O7	59086-93-0	2193.46	1800.47	1817.02	2230.24	2408.72	2150.55	2137.75	2177.04	2076.37
NEG_t251	Heveaflavone	Flavonoids	580.6	C33H24O10	23132-13-0	8910.9	10082.8	9028.65	7453.52	7376.17	6746.6	7148.75	7131.83	7397.87
NEG_t310	Isolicopyranocoumarin	Flavonoids	384.4	C21H20O7	197303-94-9	9752.54	12242.4	8584.22	9770.91	9889.06	11126.2	9151.1	9113.45	9184.53
NEG_t349	Apigenosylide A	Flavonoids	858.9	C43H54O18	1174167-29-3	5165.23	9716.29	6133.73	5353.11	4830.55	5055.1	5405.38	6213.43	5280.58
NEG_t926	Wikstrol A	Flavonoids	542.5	C30H22O10	159736-35-3	34593	36242.9	35691.6	34408.1	33100	32724.2	33269	33355	34526.1
NEG_t958	Gossypetin	Flavonoids	318	C15H10O8	489-35-0	2001.91	1975.75	2073.64	2487.11	2485.47	2317.57	2265.23	2290.21	2353.91
NEG_t962	Cordylasin A	Flavonoids	1048.9	C45H60O28	1068653-41-7	4386.98	3267.38	3311.5	3997.1	4235.64	3410.75	3867.36	4408.24	4161.05
NEG_t991	Helicianeoide A	Flavonoids	726.6	C32H38O19	496066-82-1	609650	626384	586351	659396	640096	602841	658061	682850	717252
NEG_t996	Apigenosylide B	Flavonoids	830.8	C41H50O18	1174167-30-6	1181.23	1173.63	957.654	1007.71	845.972	998.388	1301.55	1227.04	1253.86
POS_t101	Apigenin-4'-O-glucoside	Flavonoids	432.1	C21H20O10	20486-34-4	28687.2	22874.7	23075.8	20035.8	21843.3	20889.2	20677	24638.6	23646.6
POS_t206	Carthamone	Flavonoids	448.1	C21H20O11	86579-00-2	48898.9	53468.2	44747.7	50138.2	43388.8	41450.5	44550.5	46913.3	48609.6
POS_t22	Rothindin	Flavonoids	444.4	C22H20O10	63347-43-3	8811.2	9024.38	8354.44	8997.6	8986.26	8680.97	9158.27	9733.71	9481.82
POS_t267	3,6-Dimethoxyapigenin	Flavonoids	330.3	C17H14O7	22697-65-0	24522.5	21049.2	21181.8	20072.8	21893.1	21410.8	24047.3	27412.9	24397.8
POS_t277	Iso-sagittatoside A	Flavonoids	676.7	C33H40O15	503456-08-4	10.0018	10.0018	10.0018	327.327	352.274	515.076	121.167	10.0018	10.0018
POS_t686	Rhodioflavonoside	Flavonoids	626.1	C27H30O17	--	181.878	143.043	112.587	185.956	126.493	191.129	180.537	176.481	179.272
POS_t785	4'-O-Methylvitexin	Flavonoids	446.1	C22H22O10	2326-34-3	1078.01	1110.23	1015.88	1115.96	1131.48	1065.93	1179.75	1229.79	1220.83
POS_t87	Chamaemeloside	Flavonoids	576.5	C27H28O14	173356-77-9	9676.29	9511.67	8565.66	7739.45	7304.33	6942.33	8434.95	8492.57	8258.58
POS_t883	Glycyrrhiza flavonol A	Flavonoids	370.4	C20H18O7	197304-01-1	141.385	129.063	108.747	110.274	121.656	137.389	144.724	129.528	10.0018
NEG_q53	4-Pyridoxic Acid	Alkaloids	183.2	C8H9NO4	82-82-6	369306	548928	603100	502655	505914	492848	657399	676981	657026
NEG_q77	Allantoic Acid	Alkaloids	176.1	C4H8N4O4	99-16-1	81980.1	87758	88579.8	175274	155410	114609	115028	103169	81709.9
NEG_q205	Indole-3-Carboxaldehyde	Alkaloids	145.2	C9H7NO	487-89-8	220508	145151	162145	186748	168044	168887	124583	186743	237959
NEG_q208	Indolelactic Acid	Alkaloids	205.2	C11H11NO3	1821-52-9	214496	371698	222000	211906	213672	201925	274237	319388	169605
NEG_q294	Oxohydrastinine	Alkaloids	205.2	C11H11NO3	552-29-4	4.33872e+06	4.05308e+06	3.89683e+06	3.73018e+06	3.82605e+06	4.04223e+06	4.66726e+06	4.53425e+06	4.80842e+06
NEG_q355	Theophylline	Alkaloids	180.2	C7H8N4O2	58-55-9	199064	183494	197909	201987	202313	299796	236100	261041	285067
NEG_q356	Theophylline-7-Acetic Acid	Alkaloids	238.2	C9H10N4O4	652-37-9	25894	23992.5	26719	20622.4	17934.3	22561.5	17634.7	21164	23846.1
NEG_q382	Zarzissine	Alkaloids	135.1	C5H5N5	160568-14-9	2.8793e+07	2.98741e+07	3.16734e+07	3.08684e+07	2.95796e+07	3.21288e+07	4.17655e+07	4.24909e+07	4.09068e+07
POS_q35	3-Amino-2-Piperidinone	Alkaloids	114.2	C5H10N2O	1892-22-4	654250	755369	823841	643442	792122	798016	724386	994561	970055
POS_q38	3-Demethylcolchicine	Alkaloids	385.4	C21H23NO6	7336-33-6	3176.61	758.375	10.0018	10.0018	1107.27	10.0018	10.0018	4959.07	10.0018
POS_q55	5-Hydroxytryptamine	Alkaloids	176.2	C10H12N2O	50-67-9	36994	35497.8	44161.6	34554	37124.7	35566	29957	32732.1	31421
POS_q57	5-Methylcytosine	Alkaloids	125.1	C5H7N3O	554-01-8	97478.4	103259	91343.9	98814.1	79223.7	141024	143960	127899	119606
POS_q66	6-(Methylthio)Purine	Alkaloids	166.2	C6H6N4S	50-66-8	2913.8	10.0018	674.949	10.0018	860.45	10.0018	2874.24	2814.57	661.128
POS_q70	7-Ethylcamptothecin	Alkaloids	376.4	C22H20N2O4	78287-27-1	10.0018	1837.41	3617.49	4791.84	925.436	10.0018	4743.4	10.0018	14163.5
POS_q79	9-Methoxycamptothecin	Alkaloids	378.4	C21H18N2O5	39026-92-1	2132.94	10.0018	1815.55	10.0018	10.0018	1132.21	891.708	3765.56	2650.63
POS_q81	Acetylcholine (Chloride)	Alkaloids	181.7	C7H16ClNO2	60-31-1	442975	327559	404305	384972	316870	319356	391864	429561	388281
POS_q84	Adenine (Hemisulfate)	Alkaloids	233.2	C5H7N5O4S	321-30-2	2.14921e+07	25918059	2.72988e+07	2.70193e+07	2.85234e+07	2.66816e+07	3.53763e+07	3.15982e+07	3.39855e+07
POS_q87	Aicar (Phosphate)	Alkaloids	356.2	C9H17N4O9P	681006-28-0	221994	109975	77212.1	141995	218890	153460	68871.4	250805	107991
POS_q91	Allomatrine	Alkaloids	248.4	C15H24N2O	641-39-4	2343.36	10.0018	10.0018	985.305	1695.27	10.0018	1589.33	10.0018	1462.63
POS_q95	Aminophylline	Alkaloids	240.3	C9H16N6O2	317-34-0	137596	105188	157235	152018	147792	236954	164846	237782	206519
POS_q96	Anatabine	Alkaloids	160.2	C10H12N2	581-49-7	635871	585639	616595	446112	503099	521616	618946	546446	655926
POS_q109	Benzoyleneurea	Alkaloids	162.2	C8H6N2O2	86-96-4	47762	127121	112905	87152.9	54846.6	178538	132888	93754.5	189907
POS_q110	Benzoylhypaconine	Alkaloids	573.7	C31H43NO9	63238-66-4	2162.19	10.0018	10.0018	4993.96	2023.04	10.0018	385.569	751.016	4209.91
POS_q111	Berberine	Alkaloids	336.4	C20H18NO4+	2086-83-1	24803	30672.9	15056.8	40167	40213.5	42626	10.0018	10.0018	10.0018
POS_q114	Betaine	Alkaloids	117.2	C5H11NO2	107-43-7	3.3279e+06	3.09846e+06	2.98702e+06	2.60763e+06	3.10142e+06	2.62001e+06	3.44226e+06	3.196e+06	3.39236e+06
POS_q115	Betaine Hydrochloride	Alkaloids	153.6	C5H12ClNO2	590-46-5	1.78223e+06	1.77167e+06	1.78568e+06	1.45879e+06	1.59954e+06	1.70867e+06	1.96491e+06	2.15941e+06	2.10431e+06
POS_q125	Caffeine	Alkaloids	194.2	C8H10N4O2	1958-08-02	1.98157e+07	2.10124e+07	2.10657e+07	2.14021e+07	2.11231e+07	2.10956e+07	2.1947e+07	2.20904e+07	2.093e+07
POS_q126	Catharanthine	Alkaloids	336.4	C21H24N2O2	2468-21-5	10.0018	1017.79	10.0018	12986.1	10.0018	915.756	914.45	815.665	387.294
POS_q127	Catharanthine Tartrate	Alkaloids	486.4	C21H24N2O2.C4H6	2648-21-5	1267.56	2998.69	10.0018	10.0018	10.0018	1994.93	3024.89	1938.54	2986.06
POS_q130	Cephalotaxine	Alkaloids	315.4	C18H21NO4	24316-19-6	579.804	10.0018	1934.53	3166.79	1045.88	1746.05	10.0018	1768.22	416.938
POS_q131	Cepharanthine	Alkaloids	606.7	C37H38N2O6	481-49-2	10.0018	10.0018	10.0018	10.0018	1113.34	1106.74	10.0018	10.0018	10.0018
POS_q136	Cinobufotalin	Alkaloids	458.5	C26H34O7	1108-68-5	4737.18	2124.7	3374.14	10.0018	5501.62	974.102	677.37	2694.29	2777.98
POS_q138	Citicoline	Alkaloids	488.3	C14H26N4O11P2	987-78-0	55539.2	41737.5	83500.6	40762.4	42017.6	61932.2	36520.6	31391.1	51383.7
POS_q144	Corydine	Alkaloids	341.4	C20H23NO4	476-69-7	123512	113687	142984	86465.5	83370.2	103297	143297	164353	141779
POS_q145	Creatinine	Alkaloids	113.1	C4H7N3O	60-27-5	564349	548849	480222	502038	414934	481459	541638	560648	558243
POS_q155	Decorticasine	Alkaloids	196.2	C10H16N2O2	1380-03-6	26732	23411.3	28966.2	11711.3	27256.2	34350.6	38183	39865	42651
POS_q157	Deltaline	Alkaloids	507.6	C27H41NO8	6836-11-09	1443.62	3147.55	6441.48	10.0018	1392.57	10.0018	5768.2	10.0018	10.0018
POS_q159	Denudatine	Alkaloids	343.5	C22H33NO2	26166-37-0	10.0018	1102.78	1563.93	10.0018	10.0018	10.0018	10.0018	1431.64	793.025
POS_q171	Diphylline	Alkaloids	254.2	C10H14N4O4	479-18-5	83306.2	58157.7	61084.3	28740.8	38323	50108.3	24155.5	27745.2	36969.1
POS_q179	Doxofylline	Alkaloids	266.2	C11H14N4O4	69975-86-6	1999.56	1968.34	2832.68	4687.2	181.616	4648.85	6472.22	10.0018	1073.81
POS_q186	D-Tetrahydropalmatine	Alkaloids	355.4	C21H25NO4	3520-14-7	2230.35	10.0018	10.0018	754.581	5450.81	10.0018	10.0018	10.0018	4536.72
POS_q200	Febrifugine	Alkaloids	301.3	C16H19N3O3	24159-07-7	574.974	543.296	588.959	1833.7	4292.55	3041.34	4338.68	10.0018	8396.48
POS_q201	Ferruginine	Alkaloids	165.2	C10H15NO	73069-63-3	521587	631160	650846	677829	518460	750219	845696	616866	554170
POS_q225	Homodihydrocapsaicin I	Alkaloids	321.4	C19H31NO3	20279-06-5	10.0018	1242.55	1020.94	2121.02	726.058	1046.31	2391.17	1916.29	10.0018
POS_q226	Hordenine	Alkaloids	165.2	C10H15NO	539-15-1	350507	262794	291394	256778	328581	343077	382770	395429	400842
POS_q245	(-)Isosparteine	Alkaloids	234.4	C15H26N2	24915-04-6	10.0018	10.0018	1759.36	1712.5	10.0018	1374.57	923.967	1287.83	940.339
POS_q247	Jervine	Alkaloids	425.6	C27H39NO3	469-59-0	6449.54	1098.97	10.0018	978.146	10.0018	758.893	10.0018	3302.65	7445.57
POS_q252	Knightinol	Alkaloids	289.2	C17H23NO3	77053-06-6	15510.8	11367.9	22093.2	4338.36	7719.06	1679.65	14600.6	3466.91	18631.6
POS_q254	Kukoamine B	Alkaloids	530.7	C28H42N4O6	164991-67-7	10.0018	10.0018	10.0018	2577.91	10.0018	316.391	10.0018	10.0018	1339.13
POS_q255	Kynurenic Acid	Alkaloids	189.2	C10H7NO3	492-27-3	5.78956e+06	6.31192e+06	6.60679e+06	5.53364e+06	5.08718e+06	5.12026e+06	5.90394e+06	6.03538e+06	5.90056e+06
POS_q264	Laurolitsine	Alkaloids	313.4	C18H19NO4	5890-18-6	10.0018	10.0018	10.0018	1970.75	10.0018	3395.76	3870.76	1823.61	820.224
POS_q280	Liensinine	Alkaloids	610.7	C37H42N2O6	2586-96-1	2674.63	10.0018	10.0018	1179.3	705.359	2228.18	1585.75	10.0018	4388.47
POS_q287	Loline	Alkaloids	154.2	C8H14N2O	25161-91-5	1141.88	2945.54	941.306	5647.91	894.406	643.334	1261.46	10.0018	10.0018
POS_q296	Lysicamine	Alkaloids	291.3	C18H13NO3	15444-20-9	795.728	6712.67	10.0018	1575.51	7824.96	10.0018	4859.56	10.0018	10.0018
POS_q333	Neferine	Alkaloids	624.8	C38H44N2O6	2292-16-2	1096.6	10.0018	6605.71	1822.36	10.0018	10.0018	2102.08	5431.92	10.0018
POS_q342	N-Methylcytisine	Alkaloids	204.3	C12H16N2O	486-86-2	383.884	405.866	10.0018	10.0018	10.0018	10.0018	361.684	10.0018	10.0018
POS_q346	Nortropine	Alkaloids	127.2	C7H13NO	538-09-0	10.0018	10.0018	10.0018	298270	299293	314340	250386	275556	272252
POS_q348	O-Acetylethanolamine	Alkaloids	103.1	C4H9NO2	1854-30-4	3.06975e+06	3.00075e+06	3.11713e+06	1.98433e+06	2.02917e+06	2.35528e+06	2.6765e+06	2.46448e+06	2.75563e+06
POS_q358	Phellodendrine	Alkaloids	342.4	C20H24NO4	6873-13-8	10.0018	10.0018	4337.69	10.0018	650.037	10.0018	1951.42	10.0018	10.0018
POS_q366	Piperlongumine	Alkaloids	317.3	C17H19NO5	20069-09-4	1.94534e+07	1.93972e+07	2.42476e+07	2.06124e+07	2.15232e+07	2.43594e+07	2.11763e+07	1.81047e+07	2.20085e+07
POS_q367	Pipermethystine	Alkaloids	287.1	C16H17NO4	71627-22-0	18430.3	24219.9	18140.5	21696.3	11027.7	22649	13745.6	16471.3	18816.9
POS_q406	Sinomenine	Alkaloids	329.4	C19H23NO4	115-53-7	10.0018	10.0018	1912.03	2024.85	10.0018	2951.06	682.314	879.153	1322.75
POS_q413	Stachydrine	Alkaloids	143.2	C7H13NO2	471-87-4	875301	896021	1.08725e+06	833995	892397	758102	914438	979610	804343
POS_q415	Strychnine	Alkaloids	334.4	C21H22N2O2	57-24-9	10.0018	10.0018	10.0018	2292.65	10.0018	730.406	3340.63	10.0018	1779.04
POS_q423	Tetramethyluric Acid	Alkaloids	224.2	C9H12N4O3	2309-49-1	113068	98758.6	91746.1	84655.9	114247	112951	113288	90772.5	132397
POS_q424	Tetrandrine	Alkaloids	622.8	C38H42N2O6	518-34-3	10.0018	2157.7	2233.09	1106.64	10.0018	4075.7	10.0018	10.0018	2211.05
POS_q427	Theobromine	Alkaloids	180.2	C7H8N4O2	83-67-0	5.65304e+07	6.46493e+07	7.3372e+07	1.14923e+07	3.9758e+07	4.21854e+07	1.28983e+07	5.09038e+07	4.96098e+07
POS_q430	Trachelanthamidine	Alkaloids	141.2	C8H15NO	526-64-7	474898	418694	394816	354564	390201	324290	454507	393900	384208
POS_q436	Trans-Zeatinriboside	Alkaloids	351.4	C15H21N5O5	6025-53-2	658405	483243	611655	580286	187777	162825	873894	776524	723102
POS_q439	Trimethylvinylammonium(1+)	Alkaloids	86.2	C5H12N+	13448-18-5	452935	476986	1.38275e+06	525824	405859	377656	449149	664183	888618
POS_q440	Tropine Acetate-1	Alkaloids	183.1	C10H17NO2	3423-27-6	705657	781989	691236	571746	580398	707159	736965	753023	604224
POS_q442	Vasicine	Alkaloids	188.2	C11H12N2O	6159-55-3	1.39624e+06	1.31302e+06	4.06279e+06	1.35008e+06	1.22157e+06	1.38038e+06	1.2058e+06	1.22956e+06	1.5969e+06
POS_q445	Vasicinol	Alkaloids	204.2	C11H12N2O2	5081-51-6	1.70944e+07	1.77398e+07	4.56289e+07	1.50343e+07	1.42055e+07	1.56211e+07	1.62451e+07	1.77689e+07	1.93776e+07
POS_q448	Vicine	Alkaloids	304.3	C10H16N4O7	152-93-2	33873.4	41443	21223	11718	18295.8	15645	15127.3	7150.62	3106.56
POS_q449	Vincristine (Sulfate)	Alkaloids	923	C46H58N4O14S	2068-78-2	7374.95	9740.51	10.0018	10.0018	5262.11	10.0018	10.0018	10.0018	10.0018
POS_q453	Zeatin	Alkaloids	219.2	C10H13N5O	13114-27-7	1.30051e+06	1.33181e+06	1.45809e+06	1.49666e+06	1.25633e+06	1.5155e+06	1.39722e+06	1.90778e+06	977957
NEG_t1137	Doronine	Alkaloids	459.9	C21H30ClNO8	60367-00-2	5595.26	5302.12	5814.61	5894.28	6151.91	5924.06	6975.61	7299.4	7125.7
NEG_t1140	Anonamine	Alkaloids	381.4	C19H28NO7+	111566-66-6	7496.94	7252.82	7106.75	7112.1	7491.7	7397.19	8256.69	8180.01	8031.76
NEG_t129	Cartormin	Alkaloids	--	C27H29NO13	--	4796.75	4770.59	4959.14	4095.94	4138.39	3961.22	3527.29	3574.64	3771.16
NEG_t269	HYPONINE E	Alkaloids	920.9	C45H48N2O19	226975-99-1	14487.4	11672.7	9983.32	11803.4	13510.5	11377.8	11162.3	10359.1	11982.2
NEG_t294	Strictosidinic acid	Alkaloids	516.5	C26H32N2O9	150148-81-5	24307.2	23665.9	34230.8	23762.4	26494.3	24047.3	24318	24909.9	27133.9
NEG_t377	Macrophylline	Alkaloids	239.3	C13H21NO3	27841-97-0	10.0018	10.0018	10.0018	171.525	10.0018	10.0018	188.812	277.864	563.035
NEG_t855	Lycoperoside A	Alkaloids	1091.6	C52H85NO23	--	1270.67	1719.25	1416.19	1442.29	1407.12	1429.38	1898.84	1615.63	1755.7
POS_t148	Bisline	Alkaloids	353.4	C18H27NO6	30258-28-7	711.588	813.386	742.691	563.154	508.95	486.937	689.057	698.251	701.245
POS_t173	p-Coumaroylagmatine	Alkaloids	276.2	C14H20N4O2	7295-86-5	3175.79	2842.11	2525.2	2632.22	2532.1	2419.81	3220.44	3331.99	3066.78
POS_t685	Doronenine	Alkaloids	335.4	C18H25NO5	74217-57-5	449.537	399.798	337.038	250.239	181.087	301.634	331.381	368.701	296.552
POS_t773	N-Feruloylagmatine	Alkaloids	306.2	C15H22N4O3	--	1901.88	1750.65	1463.05	2063.84	1883.7	1731.19	2153.54	2182.24	1996.87
POS_t808	Aervoside	Alkaloids	398.4	C20H18N2O7	139767-01-4	819.022	847.258	808.013	670.987	673.323	674.736	811.966	869.485	813.21
NEG_q37	3-Methoxysalicylaldehyde	Ketones, Aldehydes,esters	152.2	C8H8O3	148-53-8	789949	857192	830723	474733	429329	415400	735006	573510	627316
NEG_q49	4-Hydroxyacetophenone	Ketones, Aldehydes,esters	136.2	C8H8O2	99-93-4	66445.3	47899.3	44255.1	74662	100079	47279.8	61656	60527.1	59631
NEG_q64	8,8A-Deoxyoleandolide	Ketones, Aldehydes,esters	372.2	C20H36O6	53428-54-9	10.0018	2051.15	1854.09	2108.49	1920.31	1134.62	562.609	570.122	633.056
NEG_q255	Marilactone	Ketones, Aldehydes,esters	154.2	C8H10O3	34818-17-2	169868	179418	140507	131620	97663.1	102130	121117	136072	116913
NEG_q260	Methyl Anisate	Ketones, Aldehydes,esters	166.2	C9H10O3	121-98-2	11965.5	6428.88	10586	11978	10288.8	16214.2	13087.8	6305.47	14518.7
NEG_q285	Noreugenin	Ketones, Aldehydes,esters	192.2	C10H8O4	1013-69-0	60484.6	82479.9	71098.5	56264.8	59723.7	71556.3	61339.2	32142.2	65610.6
NEG_q331	Rubinaphthin A	Ketones, Aldehydes,esters	366.3	C17H18O9	448962-05-8	557222	677376	622154	506567	485874	532287	599433	515068	545873
NEG_q347	Sterigmatocystin	Ketones, Aldehydes,esters	324.3	C18H12O6	10048-13-2	10.0018	10.0018	10.0018	10.0018	731.977	1752.59	10.0018	10.0018	10.0018
NEG_q350	Sulcatone	Ketones, Aldehydes,esters	126.2	C8H14O	110-93-0	142219	110927	144083	146631	117926	116772	129354	122171	109501
POS_q107	Benzocaine	Ketones, Aldehydes,esters	165.1	C9H11NO2	1994-09-07	3.59758e+08	3.49839e+08	3.27894e+08	3.18615e+08	3.27981e+08	3.33034e+08	4.04835e+08	3.85133e+08	3.77696e+08
POS_q184	Dronedarone	Ketones, Aldehydes,esters	556.8	C31H44N2O5S	141626-36-0	10.0018	2602.47	927.579	4139.34	10.0018	5703.63	3901.7	847.007	11516.9
POS_q205	Formylanthranilic Acid	Ketones, Aldehydes,esters	165	C8H7NO3	3342-77-6	3.30137e+08	3.15237e+08	2.99802e+08	2.92282e+08	2.88007e+08	2.95908e+08	3.49798e+08	3.41418e+08	3.41011e+08
POS_q240	Isogentisin	Ketones, Aldehydes,esters	258.1	C14H10O5	491-64-5	123227	140588	101373	46770.4	57733.3	72022.5	110662	120172	174566
POS_q319	Muscone	Ketones, Aldehydes,esters	238.4	C16H30O	541-91-3	13249	14299.7	13094	13069.1	9456	7573.75	11648	10691.9	10788
POS_q385	Raloxifene	Ketones, Aldehydes,esters	473.6	C28H27NO4S	84449-90-1	10.0018	1626.11	10.0018	2306.12	10.0018	10.0018	2263.47	1712.5	2772.55
NEG_t1076	Homoserine lactone	Ketones, Aldehydes,esters	171.2	C8H13NO3	98426-48-3	1993.85	1952.79	1698.79	4230.84	4146.09	4036.18	4199.1	4069.94	4105.85
NEG_t119	L-Threonolactone	Ketones, Aldehydes,esters	118.1	C4H6O4	21730-93-8	846.59	809.477	838.237	923.123	924.378	970.463	830.418	851.744	860.409
NEG_t1205	Phyllanthurinolactone	Ketones, Aldehydes,esters	314.3	C14H18O8	168180-12-9	4287.99	4410.99	4146.84	2978.63	3020.66	3037.68	3125.74	3172.98	3255.68
NEG_t13	Oligomycin C	Ketones, Aldehydes,esters	775.1	C45H74O10	11052-72-5	2.78424e+07	3.3236e+07	3.35203e+07	3.67843e+07	3.39825e+07	3.44926e+07	3.16615e+07	3.43358e+07	3.32676e+07
NEG_t260	Cycloepoxylactone	Ketones, Aldehydes,esters	240.3	C12H16O5	1129491-05-9	10041.7	7538.59	7158.53	7763.88	7854.83	7370.55	7799.13	7641.56	8007.72
NEG_t281	Corynesidone B	Ketones, Aldehydes,esters	332.3	C16H12O8	1159583-63-7	211.635	480.552	250.281	252.819	275.047	299.029	238.756	265.683	274.381
NEG_t328	Protoapigenone	Ketones, Aldehydes,esters	286.2	C15H10O6	862884-32-0	1313.66	1627.98	1505.36	1228.3	1033.76	994.619	1337.85	1411.56	1308.78
NEG_t347	Spirastrellolide F methyl ester	Ketones, Aldehydes,esters	1029.7	C53H85ClO17	867144-55-6	79789.9	93337.3	82444.9	161760	109212	112202	124543	143817	134160
NEG_t375	Saponaceolide C	Ketones, Aldehydes,esters	534.7	C30H46O8	138057-79-1	4963.89	5769.55	5076.47	5695.4	5588.01	5137.94	4777.99	4822.95	4936.81
NEG_t408	Marrulactone	Ketones, Aldehydes,esters	306.4	C18H26O4	1175539-00-0	28256.4	21720.7	27875.5	30744	28878.7	35484.7	39738.9	43413.8	36393
NEG_t425	Filipin III	Ketones, Aldehydes,esters	654.8	C35H58O11	480-49-9	2800.79	2374.89	3727.4	2987.63	3473.35	3351.97	3109.2	2873.22	4069.14
NEG_t450	Maltepolide C	Ketones, Aldehydes,esters	546.7	C31H46O8	1439916-66-1	42971.7	42131.6	50569.1	33782.1	29378.4	32405.3	29405.4	41184.8	32051.9
NEG_t587	Dolabelide D	Ketones, Aldehydes,esters	713	C39H68O11	185843-01-0	31362.8	33552	45393.9	42133.7	41965.3	46197.4	47319.4	50992.4	48510.9
NEG_t630	Herbimycin C	Ketones, Aldehydes,esters	560.6	C29H40N2O9	91700-92-4	289353	1.09104e+06	1.18219e+06	1.1194e+06	967682	1.11992e+06	1.34013e+06	1.27972e+06	1.12733e+06
NEG_t691	Herbimycin D	Ketones, Aldehydes,esters	647.8	C32H45N3O9S	1360604-38-1	918.156	5100.22	4859.54	6475.26	6437.81	7425.63	5540.75	5309.87	5228.59
NEG_t701	Oleandomycin	Ketones, Aldehydes,esters	687.9	C35H61NO12	3922-90-5	267.729	352.862	512.064	10.0018	10.0018	10.0018	215.267	171.45	142.681
NEG_t762	Ascidiatrienolide B	Ketones, Aldehydes,esters	318.4	C20H30O3	151434-34-3	525.074	415.957	445.575	531.041	606.211	816.438	703.851	450.209	561.896
NEG_t852	3-(2-Hydroxyphenyl)acrylic acid	Ketones, Aldehydes,esters	164.2	C9H8O3	583-17-5	24981.4	48186.6	24562.9	26782.2	23068.3	24332.1	29324.5	32967.3	30453.2
NEG_t916	5-Hexen-2-ynal	Ketones, Aldehydes,esters	94.1	C6H6O	84004-86-4	15566.3	13132.5	13956	14143.9	14461	14570.7	15048	14941.2	16153.6
NEG_t969	Erythrolide K	Ketones, Aldehydes,esters	478.9	C24H27ClO8	205191-85-1	7774.96	8464.36	7760.5	7456.64	7127.74	6713.38	7164.82	6921.71	7476.67
POS_t113	11-Deoxylandomycinone	Ketones, Aldehydes,esters	322.3	C19H14O5	--	589.763	590.068	529.911	419.653	384.108	437.618	447.534	477.401	373.998
POS_t202	5-Methoxysterigmatocystin	Ketones, Aldehydes,esters	354.3	C19H14O7	22897-08-1	536.227	396.838	425.313	418.933	422.719	411.813	392.751	450.95	421.44
POS_t224	Inumakilactone A glycoside	Ketones, Aldehydes,esters	526.5	C24H30O13	37850-48-9	2931.02	2199.52	2268.87	2197.73	2091.88	2107.21	2093.62	2590.71	2448.11
POS_t296	Maltepolide D	Ketones, Aldehydes,esters	532.7	C30H44O8	1439916-68-3	6709.61	6424.09	8229.03	6888.39	7391.24	6649.84	5910.67	6838.74	6731.8
POS_t340	Arenicolide C	Ketones, Aldehydes,esters	805	C45H72O12	930779-88-7	233773	258532	214623	210997	118329	255868	179647	227606	260908
POS_t39	Hamigeromycin F	Ketones, Aldehydes,esters	378.4	C20H26O7	1213254-17-1	3416.18	3363.09	3803.99	2993.08	2337.95	2732.85	3432.07	3378.55	3035.15
POS_t397	Phoracantholide O	Ketones, Aldehydes,esters	224.3	C14H24O2	78418-66-3	355.135	321.798	304.454	369.667	323.446	320.511	293.368	283.961	252.187
POS_t461	Guanidylfungin B	Ketones, Aldehydes,esters	1116.4	C57H101N3O18	94116-20-8	221557	122758	225118	196258	145099	116697	124224	151018	261318
POS_t605	1-Hydroxyacoronene	Ketones, Aldehydes,esters	250.3	C15H22O3	185154-98-7	3994.95	3588.57	3951.29	3713.78	2104.82	3786.78	3787.09	4426.76	3447.54
POS_t700	Macrocliniside A	Ketones, Aldehydes,esters	424.4	C21H28O9	94474-61-0	459.722	382.891	348.224	409.254	286.754	384.13	381.067	446.237	445.907
POS_t74	1-Phenyl-3-hexanone	Ketones, Aldehydes,esters	176.3	C12H16O	29898-25-7	9497.05	9766.52	8831.18	8140.96	7165.35	7788.21	8461.89	8892.48	8575.84
POS_t776	Corynether lactone	Ketones, Aldehydes,esters	288.3	C15H12O6	1446411-43-3	1969.99	5919	1999.11	2088.88	1710.53	1819.22	1812.59	1822.21	1624.42
POS_t777	Auraviketone	Ketones, Aldehydes,esters	396.3	C21H16O8	--	3988.77	3609.15	3547.86	3641.17	3809.84	3628.95	3670.57	4036.69	3902.8
POS_t819	Dendrodolide A	Ketones, Aldehydes,esters	256.3	C13H20O5	1422433-70-2	6380.83	7179.4	5938.35	4425	3556.39	3596.48	4098.38	4093.33	4034.5
POS_t841	Atramycin B	Ketones, Aldehydes,esters	452.5	C25H24O8	137109-49-0	878.944	892.337	724.885	684.532	656.95	631.973	739.546	725.972	749.882
POS_t867	Acetophenone	Ketones, Aldehydes,esters	120.1	C8H8O	98-86-2	585.2	542.912	469.549	422.182	373.268	382.19	455.455	479.564	478.91
NEG_q9	1-Monomyristin	Lipid	302.4	C17H34O4	589-68-4	3.74304e+06	4.50451e+06	3.2892e+06	6.90574e+06	5.88543e+06	6.72701e+06	8.36271e+06	8.85469e+06	7.9494e+06
NEG_q23	2-Hydroxypalmitic Acid	Lipid	272.4	C16H32O3	764-67-0	6.36971e+06	5.93568e+06	6.28546e+06	7.02351e+06	7.03288e+06	8.30673e+06	9.66094e+06	9.19899e+06	9.85616e+06
NEG_q28	2-Tridecanone	Lipid	198.3	C13H26O	593-08-8	494050	172983	117654	190839	242955	193252	178029	205335	135824
NEG_q92	Azelaic Acid	Lipid	188.2	C9H16O4	123-99-9	1.93355e+06	1.40568e+06	1.52312e+06	1.96446e+06	2.60896e+06	2.32301e+06	2.42098e+06	2.40878e+06	2.60576e+06
NEG_q112	Cinnamic Acid	Lipid	148.2	C9H8O2	621-82-9	235235	479711	171005	155496	155340	211090	219044	286178	306411
NEG_q121	Decanedioic Acid	Lipid	202.2	C10H18O4	111-20-6	1.1619e+06	1.18378e+06	1.27351e+06	907989	1.95854e+06	988595	1.03596e+06	865686	1.03845e+06
NEG_q129	D-Glucuronic Acid Lactone	Lipid	176.1	C6H8O6	32449-92-6	154713	492439	92276.1	134731	436808	428449	158520	87626.2	475533
NEG_q132	Diethyl Phosphate	Lipid	154.1	C4H11O4P	598-02-7	47863.5	59797.3	64836	57922.6	56504.1	70632.2	88363	77589	92699.7
NEG_q136	Dihydrolipoic Acid	Lipid	208.3	C8H16O2S2	462-20-4	3.73884e+07	1.39684e+07	1.05862e+07	7.32206e+06	1.02576e+07	1.09485e+07	2.36723e+07	1.37213e+07	9.02837e+06
NEG_q155	Dodecanedioic Acid	Lipid	230.3	C12H22O4	693-23-2	145375	144586	170601	150331	181875	165791	189543	182792	201924
NEG_q191	Gondoic Acid	Lipid	310.5	C20H38O2	5561-99-9	4.07227e+07	3.39863e+07	4.11252e+07	2.67048e+07	2.86998e+07	3.03525e+07	5.99302e+07	5.10245e+07	4.34839e+07
NEG_q220	(±)-Jasmonic Acid	Lipid	210.3	C12H18O3	77026-92-7	138543	133903	124169	71786.6	76077.5	70661.8	106827	108739	116270
NEG_q226	Lactitol (Monohydrate)	Lipid	362.3	C12H26O12	81025-04-9	72833	265973	294214	260515	29976.5	221060	293345	296689	198026
NEG_q258	Methyl 3-Phenylpropanoate	Lipid	164.2	C10H12O2	103-25-3	1.4283e+07	5.27996e+06	5.97231e+06	4.22828e+06	2.90619e+06	3.30669e+06	7.04027e+06	3.50543e+06	7.44671e+06
NEG_q267	Methyl Tridecanoate	Lipid	228.4	C14H28O2	1731-88-0	1.96337e+06	1.95471e+06	1.81175e+06	1.62063e+06	1.34692e+06	1.68158e+06	2.36829e+06	2.41324e+06	2.28891e+06
NEG_q269	Monomethyl Fumarate	Lipid	130.1	C5H6O4	2756-87-8	167703	160558	158686	126134	116517	150451	26419.3	27551	27678
NEG_q273	Myristoleic Acid	Lipid	226.4	C14H26O2	544-64-9	3.53172e+06	4.88778e+06	3.107e+06	5.50336e+06	2.3163e+06	2.88541e+06	3.39611e+06	3.67584e+06	4.50978e+06
NEG_q287	Octadecanedioic Acid	Lipid	314.5	C18H34O4	871-70-5	152142	151206	139666	10.0018	10.0018	10.0018	10.0018	10.0018	10.0018
NEG_q346	Sodium 5-Hydroxyhexanoate	Lipid	156.2	C6H13NaO3	185956-02-9	2.41999e+06	469169	408935	1.80838e+06	215079	1.80103e+06	343517	456180	410236
NEG_q369	Undecanedioic Acid	Lipid	216.3	C11H20O4	1852-04-6	117749	111213	71554.3	114927	189995	339213	206048	148481	188249
POS_q45	4-Hydroxynonenal	Lipid	156.2	C9H16O2	75899-68-2	118993	109578	89881.4	97598.8	127706	85761.6	81159.7	92224.3	110427
POS_q313	Methyl Octanoate	Lipid	158.2	C9H18O2	111-11-5	12583.9	13079	13522	7109.95	6372.41	10.0018	10.0018	10.0018	7777.31
POS_q314	Methyl Oleate	Lipid	296.5	C19H36O2	112-62-9	10.0018	10.0018	4441.89	6192.64	883.547	4452.23	10.0018	10.0018	1062.06
POS_q349	Obscuraminol D	Lipid	255.4	C16H33NO	350484-99-0	122608	85018.1	73684.7	273727	361900	260116	56864.4	1833.75	27119
POS_q359	Phosphorylcholine	Lipid	183.1	C5H14NO4P	3616-04-04	2.41927e+06	2.54261e+06	2.70384e+06	3.03688e+06	3.04082e+06	3.0498e+06	3.15352e+06	2.63845e+06	2.86187e+06
NEG_t1003	Malonylcarnitine	Lipid	247.2	C10H17NO6	910825-21-7	742.711	667.302	521.704	1643.54	1755.59	1573.97	747.253	724.23	779.888
NEG_t1060	6-Deoxy-L-sorbose	Lipid	164.2	C6H12O5	18545-94-3	2318.51	2399.9	2474.36	2772.98	2815.48	2834.85	3135.69	3230.76	3663.09
NEG_t384	TR-saponin A methyl ester	Lipid	1037.2	C53H80O20	288153-01-5	15359.7	21617.6	2883.74	4893.55	4399.65	3711.65	3888.48	3777.01	4660.68
NEG_t433	3'-epiafroside	Lipid	534.6	C29H42O9	89016-27-3	16617.7	14886.2	21675.4	16028.5	15347.2	15575	11540.2	17218.9	13619
NEG_t499	β-Cortol	Lipid	368.5	C21H36O5	667-65-2	578.984	584.234	319.122	410.984	400.427	436.546	621.884	353.636	447.318
NEG_t501	lobarialide C	Lipid	438.6	C29H42O3	1175094-37-7	64761.6	59241.4	56353.9	78091.6	80665.3	78570.1	61786.2	55251.5	63020.6
NEG_t549	4-hydroxybutyl hexadecanoate	Lipid	328.5	C20H40O3	18498-23-2	1377.7	1396.76	1414.69	1643.98	1620.66	2007.44	1505.59	1614.13	1313.7
NEG_t611	22-Oxononacosanoic acid	Lipid	452.8	C29H56O3	94271-09-7	4244.13	6835.77	7376.08	4083.8	3780.32	5483.14	5563.42	6348.9	4154.72
NEG_t623	2-butoxyethyl linoleate	Lipid	380.6	C24H44O3	101296-24-6	1387.42	1304.52	1272.45	1411.09	1594.62	2047.43	1426.96	1408.13	1694.29
NEG_t629	Octadecanoic acid,cyclohexyl ester	Lipid	366.6	C24H46O2	104-07-4	2296.94	1996.73	1693.44	2038.13	2415.11	2628.37	2016.46	2168.79	1913.75
NEG_t631	Trixagoyl acetate	Lipid	332.5	C22H36O2	69903-58-8	1638.62	1473.16	1345.2	1719.33	1863.17	2022.55	1362.58	1119.33	1307.49
NEG_t672	Pentadecyl acrylate	Lipid	282.5	C18H34O2	43080-23-5	1553.87	1200.09	1443.16	1204.4	1047.77	1137.34	1069.28	1225.6	1094.23
NEG_t675	1-Oleoylglycerophosphocholine	Lipid	522.7	C26H53NO7P+	--	3252.3	3343	3233.34	3481.89	3429.23	3427.01	3606.55	3278.84	3446.3
NEG_t681	Norselic acid A	Lipid	452.6	C29H40O4	1190954-38-1	837.038	542.091	477.221	613.136	654.788	711.713	659.902	196.311	410.523
NEG_t710	18-Hydroxyelaidic acid	Lipid	298.5	C18H34O3	14868-25-8	1287.56	1489.59	1574.78	2635.65	43422.8	2186.9	2381.68	1345.19	3928.56
NEG_t72	Digalactosyldiacylglycerol	Lipid	917.2	C49H88O15	145033-48-3	972371	875516	898228	1.32602e+06	1.14935e+06	1.12189e+06	856886	834252	947082
NEG_t744	Gingerglycolipid B	Lipid	678.4	C33H58O14	88168-90-5	11919.4	11772.3	13077.6	11920.8	10670.7	12184.8	8227.49	11523.3	9942.26
NEG_t76	Gingerglycolipid A	Lipid	676.4	C33H56O14	145937-22-0	34851.5	39472.9	37414.4	34725.5	34649.2	34362.5	30795.9	34900.2	32654.8
NEG_t84	Soyacerebroside I	Lipid	714	C40H75NO9	114297-20-0	4.42144e+06	5.00383e+06	4.90256e+06	6.19523e+06	5.68903e+06	5.55205e+06	5.47985e+06	5.52776e+06	5.88961e+06
NEG_t867	Linckoside F	Lipid	624.8	C34H56O10	900811-70-3	8759.77	7861.42	9247.42	7638.31	8379.72	8464.68	9017.85	8717.74	9717.76
NEG_t912	Longifolioside A	Lipid	534.9	C22H27ClO13	1246457-29-3	46873.5	45909.9	45154.8	44655.2	44182.4	43418	42998.6	43264.2	46300.1
NEG_t920	3,5-dihydroxydecanoic acid	Lipid	204.3	C10H20O4	--	21666.5	25840.9	18128.3	21633.4	19602.3	21307.6	22094.7	21523.4	21580.8
NEG_t981	11-Hydroxyjasmonic acid	Lipid	226.3	C12H18O4	140447-14-9	66558.5	55137.9	52759.6	59637.4	61016.6	59398.2	62681.3	62385.4	65434.4
POS_t269	9-Acetyloxydecanoic acid	Lipid	230.3	C12H22O4	118448-87-6	5245.29	4766.39	4896.95	4461.41	4132.11	4911.47	5632.56	5874.29	5267.92
POS_t416	Squafosacin B	Lipid	624.9	C37H68O7	1017587-47-1	205740	183494	203142	197219	196386	239670	231089	249326	212495
POS_t459	11-Docosenoic acid	Lipid	338.6	C22H42O2	506-36-5	2100.77	995.992	1186.03	599.447	10.0018	755.177	834.226	1036.16	137.946
POS_t470	Salannal	Lipid	612.7	C34H44O10	86160-86-3	6716.41	26457.3	31648.8	15320.3	8028.35	16333.2	24460.3	26668.6	10597.5
POS_t533	1,9-Dideoxy coleonol-B	Lipid	378.5	C22H34O5	104831-92-7	135084	136837	128720	41132.4	40453.4	42728.1	42572.9	51035	48415.5
POS_t546	Dodecanoic acid,10-methyl-	Lipid	214.3	C13H26O2	7416-57-1	2156.37	1409.62	1186.8	818.402	116.302	670.552	2277.75	1727.18	1786.83
POS_t55	Foliasalacioside B2	Lipid	504.6	C24H40O11	1002129-85-2	105967	232327	247979	229513	192731	217986	239971	250037	208672
POS_t550	Jasmolin I	Lipid	331.5	C21H31O3	4466-14-2	540.167	433.646	663.731	763.115	343.465	695.375	470.737	555.6	367.688
POS_t552	9,12-Octadecadien-6-Ynoic Acid	Lipid	276.2	C18H28O2	61481-29-6	8375.17	7947.39	7718.69	5883.81	5236.24	6472.18	8240.39	9381.16	7434.83
POS_t554	12-Methyltridecanoic Acid	Lipid	228.4	C14H28O2	2724-57-4	3618.68	3618.07	3671.74	2635.29	1731.33	2664.07	2854.03	3352.31	2460.9
POS_t57	Pinolenic acid	Lipid	278.4	C18H30O2	16833-54-8	34267.4	35478.9	36475.5	36745	65518.5	36578.7	35115.2	38217.4	33625.6
POS_t601	19-Norandrostenedione	Lipid	272.4	C18H24O2	734-32-7	2554.83	2191.42	2625.42	2314.1	1611.64	2328.37	2510.75	2852.37	2344.93
POS_t627	cyclopenicillone	Lipid	224.3	C13H20O3	1335221-07-2	498.589	420.38	554.86	346.841	307.42	383.437	454.79	519.907	435.655
POS_t683	Isocentratherin	Lipid	374.4	C20H22O7	80377-52-2	1770.82	1653.26	1804.56	1469.55	1318.03	1400.81	1514.9	1678.43	1523.21
NEG_q3	1,3-Dicaffeoylquinic Acid	Organic Acid	516.5	C25H24O12	19870-46-3	74082.5	262368	133274	113813	75426.5	63973.8	62906.8	95064.8	57856.8
NEG_q13	2,4,6-Trihydroxybenzoic Acid	Organic Acid	170.1	C7H6O5	83-30-7	377023	254525	291376	250598	279455	313203	444106	515377	332780
NEG_q19	2-Dimethylaminoethylphosphonic Acid	Organic Acid	153.1	C4H12NO3P	14596-56-6	36999.3	27570.4	42147	37299.2	19292.6	29238.3	28179.6	39197.9	27612.8
NEG_q22	2-Hydroxyhexanoic Acid	Organic Acid	132.2	C6H12O3	6064-63-7	1.21828e+06	930024	859455	1.29501e+06	1.3902e+06	1.42265e+06	1.34677e+06	1.36496e+06	1.24365e+06
NEG_q24	2-Oxobutanoic Acid	Organic Acid	102.1	C4H6O3	600-18-0	304683	274664	280055	143329	137767	145917	222300	237204	233468
NEG_q31	3,5-Dihydroxybenzoic Acid	Organic Acid	154.1	C7H6O4	1999-10-05	345969	275068	343256	132823	133632	177042	325800	282216	268805
NEG_q40	3-O-Methylgallic Acid	Organic Acid	184.2	C8H8O5	3934-84-7	1.65471e+06	2.87143e+06	2.88759e+06	709382	642260	725622	1.23375e+06	1.88255e+06	1.22578e+06
NEG_q47	4-Ethyloctanoic Acid	Organic Acid	172.3	C10H20O2	16493-80-4	1.28127e+06	1.25207e+06	1.32074e+06	892904	953714	828779	1.5832e+06	1.72397e+06	1.65803e+06
NEG_q55	5-Methoxy-5-Oxopentanoic Acid	Organic Acid	146.1	C6H10O4	1501-27-5	332.172	10.0018	10.0018	10.0018	10.0018	10.0018	988.181	1631.83	522.138
NEG_q60	6-Hydroxyhexanoic Acid	Organic Acid	132.2	C6H12O3	1191-25-9	3.21937e+06	676544	2.95114e+06	2.40736e+06	2.34952e+06	2.49531e+06	2.80722e+06	2.80531e+06	2.74364e+06
NEG_q62	7(1)-Hydroxychlorophyllide A	Organic Acid	630.2	C35H34MgN4O6	--	746.705	1395.61	691.283	10.0018	10.0018	10.0018	1491.37	700.226	1871.81
NEG_q70	Abscisic Acid	Organic Acid	264.3	C15H20O4	21293-29-8	2.30327e+07	2.98971e+07	2.67576e+07	1.89595e+07	1.6266e+07	1.56251e+07	2.09998e+07	1.80207e+07	1.76908e+07
NEG_q82	Aminomalonic Acid	Organic Acid	119.1	C3H5NO4	1068-84-4	4.45402e+06	4.971e+06	4.68503e+06	3.73514e+06	3.85113e+06	3.72999e+06	4.41076e+06	4.63659e+06	4.19775e+06
NEG_q96	Benzoic Acid	Organic Acid	122.1	C7H6O2	65-85-0	10.0018	10.0018	10.0018	29663.4	27314	28736	10.0018	10.0018	10.0018
NEG_q101	Brevifolincarboxylic Acid	Organic Acid	292.2	C13H8O8	18490-95-4	2.03846e+07	1.9747e+07	1.93682e+07	2.58774e+07	2.52173e+07	2.61707e+07	2.84916e+07	2.72468e+07	2.74184e+07
NEG_q106	(-)-Camphoric Acid	Organic Acid	200.2	C10H16O4	560-09-8	139682	124266	136907	142279	72050.6	171861	212332	168706	98244.6
NEG_q139	Dl-3-Phenyllactic Acid	Organic Acid	166.2	C9H10O3	828-01-3	2.52038e+06	2.37127e+06	1.9718e+06	4.11781e+06	3.72769e+06	4.20151e+06	4.5597e+06	4.29735e+06	3.42031e+06
NEG_q145	Dl-Tartaric Acid	Organic Acid	150.1	C4H6O6	133-37-9	561828	572570	606084	652562	663254	654703	668990	648961	660087
NEG_q147	D-Malic Acid	Organic Acid	134.1	C4H6O5	636-61-3	4.63283e+07	4.28609e+07	4.18642e+07	3.80841e+07	3.75058e+07	4.20819e+07	4.46073e+07	4.69013e+07	4.11954e+07
NEG_q149	D-Mandelic Acid	Organic Acid	152.2	C8H8O3	611-71-2	76422	88632.7	79597.3	67960.1	77189.1	48012.4	120234	119278	135550
NEG_q158	D-Quinic Acid	Organic Acid	192.2	C7H12O6	77-95-2	6.29412e+08	6.25169e+08	6.08148e+08	4.92937e+08	5.14023e+08	5.38865e+08	5.72675e+08	5.6038e+08	5.51679e+08
NEG_q162	D-Tartaric Acid	Organic Acid	150.1	C4H6O6	526-83-0	136280	63889.7	149220	62974.3	41471.8	158870	84116.8	62320.4	69802.8
NEG_q168	Ethylmalonic Acid	Organic Acid	132.1	C5H8O4	601-75-2	1.02736e+06	936391	816555	627154	604693	622453	780091	838399	687328
NEG_q183	Ginkgolic Acid	Organic Acid	320.5	C20H32O3	20261-38-5	10.0018	1875.62	10.0018	10.0018	10.0018	10.0018	10.0018	3405.12	10.0018
NEG_q189	Glycolic Acid	Organic Acid	76	C2H4O3	79-14-1	269509	255605	247822	401644	322145	365582	396865	109674	362807
NEG_q201	Hypotaurine	Organic Acid	109.2	C2H7NO2S	300-84-5	848.432	2579.17	362.427	727.308	10.0018	2194.57	1806.35	10.0018	10.0018
NEG_q206	Indole-3-Carboxylic Acid	Organic Acid	161.2	C9H7NO2	771-50-6	16984.1	12401.4	15020.8	7780.09	17097.3	16036.6	23666.7	21230.9	20609.8
NEG_q207	Indole-3-Pyruvic Acid	Organic Acid	203.2	C11H9NO3	392-12-1	57213	53729	56134.8	61949.4	56078.8	57566	76668.8	79492.2	79846.9
NEG_q211	Isethionic Acid	Organic Acid	126.1	C2H6O4S	107-36-8	82370.7	93465.9	74498.5	85483.8	71747	60582.4	64578.1	72480.5	72006.3
NEG_q212	Isethionic Acid Sodium Salt	Organic Acid	148.1	C2H5NaO4S	1562-00-1	155011	116344	125989	146408	120808	119985	130679	150210	106834
NEG_q214	Isochorismate	Organic Acid	226.1	C10H10O6	22642-82-6	771.585	472.197	10.0018	1652.88	890.635	1242.06	380.835	1162.89	2589.71
NEG_q248	Malic Acid	Organic Acid	134.1	C4H6O5	6915-15-7	1.26332e+08	1.14995e+08	1.16588e+08	1.09613e+08	1.07683e+08	1.10255e+08	1.19329e+08	1.20013e+08	1.18344e+08
NEG_q250	Malonic Acid	Organic Acid	104.1	C3H4O4	141-82-2	1.05834e+06	1.0415e+06	1.01378e+06	1.00357e+06	886952	1.00314e+06	1.19198e+06	1.25225e+06	1.10715e+06
NEG_q252	Mandelic Acid	Organic Acid	152.2	C8H8O3	90-64-2	519525	500314	525582	444990	362785	375540	518774	444206	519172
NEG_q256	Methyl 2,4,6-Trihydroxybenzoate	Organic Acid	184.2	C8H8O5	3147-39-5	40460	45780	42320.9	84708.9	62929.4	60164.9	66057.8	74090.5	81389.9
NEG_q264	Methylmalonic Acid	Organic Acid	118.1	C4H6O4	516-05-2	1.02298e+07	8.58053e+06	7.99332e+06	7.068e+06	7.27427e+06	6.91416e+06	8.24647e+06	8.33976e+06	8.02373e+06
NEG_q292	Orotic Acid	Organic Acid	156.1	C5H4N2O4	65-86-1	5.45519e+06	5.19877e+06	5.38057e+06	4.77124e+06	4.65504e+06	4.7292e+06	5.59437e+06	5.07334e+06	4.99323e+06
NEG_q293	Oxalic Acid	Organic Acid	90	C2H2O4	144-62-7	2.52206e+06	1.83279e+06	2.40567e+06	2.19426e+06	2.12723e+06	2.1754e+06	2.66703e+06	2.68535e+06	3.1704e+06
NEG_q298	P-Coumaroyl Quinic Acid	Organic Acid	338.1	C16H18O8	--	1.61995e+08	1.71103e+08	1.71034e+08	1.27965e+08	1.28385e+08	1.35447e+08	1.50297e+08	1.54339e+08	1.53094e+08
NEG_q342	Shikimic Acid	Organic Acid	174.2	C7H10O5	138-59-0	2.20149e+07	2.16276e+07	1.89233e+07	1.33375e+07	1.54126e+07	1.67887e+07	1.8374e+07	1.86224e+07	1.74309e+07
NEG_q343	(S)-Malic Acid	Organic Acid	134.1	C4H6O5	97-67-6	8.77282e+07	7.91752e+07	8.77615e+07	7.6611e+07	7.94296e+07	8.20529e+07	9.18646e+07	8.89385e+07	8.51872e+07
NEG_q348	Succinic Acid	Organic Acid	118.1	C4H6O4	110-15-6	9.79036e+06	7.92348e+06	8.14254e+06	6.4985e+06	7.37604e+06	6.81672e+06	8.30973e+06	7.97269e+06	8.04502e+06
NEG_q352	Taurine	Organic Acid	125.2	C2H7NO3S	107-35-7	141481	153326	143787	142340	145117	139282	142902	138245	137336
NEG_q365	Traumatic Acid	Organic Acid	228.3	C12H20O4	6402-36-4	3.95366e+07	3.84364e+07	4.46725e+07	2.39618e+07	2.34279e+07	2.49949e+07	3.39221e+07	3.46615e+07	3.261e+07
NEG_q366	Tricarballylic Acid	Organic Acid	176.1	C6H8O6	99-14-9	758822	623889	623134	429078	527391	470502	571902	612678	585546
NEG_q381	(Z)-Aconitic Acid	Organic Acid	174.1	C6H6O6	585-84-2	3.4012e+07	2.8706e+07	2.91593e+07	2.49325e+07	2.5609e+07	2.66714e+07	3.29054e+07	3.00859e+07	2.89333e+07
POS_q11	2,4,5-Trimethoxybenzoic Acid	Organic Acid	212.2	C10H12O5	490-64-2	316822	348227	344539	258514	128366	267177	241010	241502	280996
POS_q13	2,6-Diaminoheptanedioic Acid	Organic Acid	190.2	C7H14N2O4	583-93-7	842890	807879	768574	712902	799817	810388	961411	868083	898849
POS_q196	Ethyl 4-Methoxysalicylate	Organic Acid	180.2	C10H12O3	60770-00-5	9554.62	2089.51	10.0018	941.319	9594.44	10.0018	3736.95	10496.4	10.0018
POS_q361	P-Hydroxymandelic Acid	Organic Acid	168	C8H8O4	1198-84-1	232718	149376	261224	168680	261319	124593	219147	287710	294410
POS_q458	γ-Aminobutyric Acid	Organic Acid	103.1	C4H9NO2	1956-12-02	1.38258e+08	1.25759e+08	1.34949e+08	1.25011e+08	1.24658e+08	1.34327e+08	1.33967e+08	1.23045e+08	1.32492e+08
NEG_t1071	L-Fuconate	Organic Acid	180.2	C6H12O6	26372-13-4	1261.92	1274.06	1185.17	1208.41	1219.64	1387.54	1275.68	1327.71	1337.65
NEG_t1094	Mudanoside B	Organic Acid	464.1	C18H24O14	203511-37-9	533.149	486.15	485.817	395.524	417.486	418.29	415.115	429.605	458.911
NEG_t1104	3-Galloylquinic acid	Organic Acid	344.3	C14H16O10	17365-11-6	23141.4	43883.6	22245.8	7217.67	7247.72	6020.67	9326.74	8491.72	9667.55
NEG_t1106	2,4,5-Trihydroxybenzoic Acid	Organic Acid	170.1	C7H6O5	610-90-2	53380.7	62798.9	60704.2	54828.3	49800.4	45947	45691.6	47160.1	47273.7
NEG_t140	2-Propoxyacetic acid	Organic Acid	118.1	C5H10O3	54497-00-6	2831.75	2692.35	2595.25	2401.48	2465.72	2408.26	2438.41	2396.79	2445.54
NEG_t4	2,4-Dihydroxybutanoic acid	Organic Acid	120.1	C4H8O4	1518-62-3	29875.3	27328.1	29250.2	32270.4	35963.1	32805.4	29032.8	28895.4	30762.9
POS_t27	2-Aminobutyric acid	Organic Acid	103.1	C4H9NO2	2835-81-6	705.049	668.808	568.836	404.405	387.798	392.842	461.042	455.52	428.332
POS_t275	10-Oxoundecanoic acid	Organic Acid	200.3	C11H20O3	676-00-6	2355.68	2148.61	2244.8	2266.67	1758.83	2262.35	2319.85	2342.37	2149.28
POS_t295	1-Cyclohexene-1-butanoic acid	Organic Acid	168.2	C10H16O2	2826-55-3	954.509	937.912	846.292	742.168	642.159	841.056	1046.07	1172.26	877.583
POS_t30	2-Oxopiperidine-4-carboxylic acid	Organic Acid	143.1	C6H9NO3	24537-50-6	1283.87	1248.16	1077.87	1042.01	987.284	1032.11	1090.1	1122.62	1006.15
POS_t711	3-Methoxy-2-methylbenzoic acid	Organic Acid	166.2	C9H10O3	55289-06-0	507.003	457.171	475.105	437.386	320.383	387.895	430.64	479.535	419.905
POS_t762	Mechercharmycin A	Organic Acid	708.7	C35H32N8O7S	822520-96-7	2048.48	2045.51	1725.11	1525.17	1384.44	1511.74	1430.37	1508.87	1543.1
POS_t795	Dehydrocarolic acid	Organic Acid	180.2	C9H8O4	67381-76-4	1185.81	1418.11	1317.79	1246.98	1097.36	1088.85	1060.88	1116.06	977.055
NEG_q90	D-Aspartic Acid	Amino acids	133.1	C4H7NO4	1783-96-6	9.81802e+06	9.21544e+06	9.44099e+06	1.21783e+07	1.29524e+07	1.1902e+07	1.19036e+07	1.21328e+07	1.19241e+07
NEG_q130	D-Glutamic Acid	Amino acids	147.1	C5H9NO4	6893-26-1	1133.84	591.892	607.104	588.044	576.871	586.277	590.18	10.0018	10.0018
NEG_q140	Dl-Arginine	Amino acids	174.2	C6H14N4O2	7200-25-1	3.8623e+06	9.03134e+06	8.36258e+06	4.66776e+06	4.12658e+06	4.14817e+06	4.70558e+06	4.36032e+06	8.79274e+06
NEG_q190	Glycylglycine	Amino acids	132.1	C4H8N2O3	556-50-3	1.71602e+06	2.01108e+06	2.00532e+06	1.68484e+06	1.46839e+06	1.55756e+06	2.08276e+06	2.24999e+06	2.0016e+06
NEG_q225	L-4-Hydroxyisoleucine	Amino acids	147.2	C6H13NO3	6001-78-8	16179	20750.4	18498	9457.06	13174.7	13340.6	18789.3	16995.2	20697.4
NEG_q227	L-Allothreonine	Amino acids	119.1	C4H9NO3	28954-12-3	4.73587e+06	5.10155e+06	4.95437e+06	3.90697e+06	3.86976e+06	4.21354e+06	4.57149e+06	4.69579e+06	4.43088e+06
NEG_q231	L-Aspartic Acid	Amino acids	133.1	C4H7NO4	56-84-8	1.374e+07	1.30929e+07	1.30558e+07	1.78422e+07	1.79857e+07	1.73584e+07	1.80218e+07	1.73072e+07	1.6158e+07
NEG_q234	L-Glutamic Acid	Amino acids	147.1	C5H9NO4	56-86-0	4.20787e+07	4.10256e+07	4.52313e+07	4.42759e+07	4.46013e+07	4.23531e+07	4.55471e+07	4.62001e+07	4.38054e+07
NEG_q237	L-Methionine Sulfoxide	Amino acids	165.2	C5H11NO3S	3226-65-1	265859	263542	272886	269173	318514	306969	411570	365695	346337
NEG_q238	L-Ornithine	Amino acids	132.2	C5H12N2O2	70-26-8	2.09644e+06	1.60905e+06	1.68833e+06	2.44669e+06	2.33356e+06	2.46668e+06	2.51173e+06	2.36298e+06	2.24567e+06
NEG_q240	L-Serine	Amino acids	105.1	C3H7NO3	56-45-1	4.56753e+06	4.80986e+06	4.6529e+06	5.0646e+06	4.97302e+06	5.15329e+06	5.23221e+06	5.07453e+06	5.10607e+06
NEG_q242	L-Threonine	Amino acids	119.1	C4H9NO3	72-19-5	4.93894e+06	5.60865e+06	5.15482e+06	4.29354e+06	4.25435e+06	4.49126e+06	5.01088e+06	5.15615e+06	4.90405e+06
NEG_q243	L-Tyrosine	Amino acids	181.2	C9H11NO3	60-18-4	1.05707e+07	1.01664e+07	9.3142e+06	5.78335e+06	5.93295e+06	6.20921e+06	7.71943e+06	7.81187e+06	7.46959e+06
POS_q151	D(-)-2-Aminobutyric Acid	Amino acids	103.1	C4H9NO2	2623-91-8	2.18957e+06	2.32703e+06	2.44008e+06	2.29735e+06	2.46784e+06	2.48556e+06	2.71079e+06	2.51625e+06	2.67652e+06
POS_q153	D-Allothreonine	Amino acids	119.1	C4H9NO3	24830-94-2	410393	374942	398386	419506	509231	454969	414338	526852	535021
POS_q172	Dl-3-Phenylalanine	Amino acids	165.2	C9H11NO2	150-30-1	1.56626e+08	1.64797e+08	1.44609e+08	1.27946e+08	4.93821e+07	1.48183e+08	5.88925e+07	1.81443e+08	1.74158e+08
POS_q173	Dl-Alanine	Amino acids	89.1	C3H7NO2	302-72-7	519373	537166	463345	525760	579923	470621	510812	613066	519023
POS_q174	D-Leucine	Amino acids	131.2	C6H13NO2	328-38-1	5.4328e+06	5.09638e+06	5.62968e+06	5.88834e+06	6.46072e+06	6.17158e+06	6.92701e+06	7.4557e+06	7.58618e+06
POS_q176	Dl-Threonine	Amino acids	119.1	C4H9NO3	80-68-2	1.33226e+07	12025763	1.15844e+07	1.1616e+07	1.17202e+07	1.18647e+07	1.40478e+07	1.45169e+07	1.51777e+07
POS_q177	Dl-Tryptophan	Amino acids	204.2	C11H12N2O2	1954-12-06	9.44137e+06	3.97612e+07	3.90982e+07	3.70339e+07	3.68778e+07	7.82303e+06	1.10887e+07	9.97877e+06	5.88559e+06
POS_q181	D-Phenylalanine	Amino acids	165.2	C9H11NO2	673-06-3	3.20671e+07	3.0922e+07	3.00045e+07	2.76794e+07	30841806	2.99382e+07	2.852e+07	3.36117e+07	3.31554e+07
POS_q183	D-Proline	Amino acids	115.1	C5H9NO2	344-25-2	5.53146e+07	5.18008e+07	4.97786e+07	5.09489e+07	5.23243e+07	5.20596e+07	5.34095e+07	5.73721e+07	5.54761e+07
POS_q185	D-Serine	Amino acids	105.1	C3H7NO3	312-84-5	1.46228e+06	1.48796e+06	1.48295e+06	2.10651e+06	2.29663e+06	2.3243e+06	1.88824e+06	2.09097e+06	2.0788e+06
POS_q241	Isoleucine	Amino acids	131.1	C6H13NO2	443-79-8	1.27634e+07	1.21128e+07	1.31062e+07	1.30978e+07	1.41625e+07	1.50882e+07	1.49595e+07	1.46958e+07	1.49798e+07
POS_q259	L-Alanine	Amino acids	89	C3H7NO2	56-41-7	303434	332734	407106	253362	311702	353066	341509	361283	372779
POS_q260	L-Alloisoleucine	Amino acids	131.2	C6H13NO2	1509-34-8	6.70719e+06	5.83977e+06	3.06908e+07	6.31203e+06	2.05146e+07	6.26604e+06	2.3945e+07	7.5818e+06	8.27351e+06
POS_q261	L-Arginine	Amino acids	174.2	C6H14N4O2	74-79-3	1.51565e+07	1.59821e+07	1.59112e+07	1.71046e+07	1.85062e+07	1.78122e+07	1.86091e+07	1.87491e+07	1.77176e+07
POS_q267	L-Citrulline	Amino acids	175.2	C6H13N3O3	372-75-8	2.57857e+07	2.38579e+07	2.10332e+07	1.76042e+07	1.80834e+07	2.01516e+07	2.00917e+07	2.10706e+07	1.98549e+07
POS_q273	L-Glutamine	Amino acids	146.1	C5H10N2O3	56-85-9	9.42972e+06	7.67338e+06	7.70076e+06	8.91305e+06	9.75892e+06	1.02603e+07	9.45404e+06	9.69538e+06	9.86735e+06
POS_q274	L-Histidine	Amino acids	155.2	C6H9N3O2	71-00-1	721681	985774	774942	1.2666e+06	1.0592e+06	1.34303e+06	1.18605e+06	1.09662e+06	1.2166e+06
POS_q275	L-Homocitrulline	Amino acids	189.2	C7H15N3O3	1190-49-4	58366.6	61114.9	61607	60874.1	45515.7	112285	106705	91283.9	66102.2
POS_q276	L-Homocysteine	Amino acids	135.2	C4H9NO2S	6027-13-0	37321.5	60187.6	48512.3	68232.6	66204	60318.3	58646.1	21135.1	61890.3
POS_q277	L-Homoserine	Amino acids	119.1	C4H9NO3	672-15-1	375336	326592	436877	437271	571135	466442	476328	454395	514557
POS_q282	L-Isoleucine	Amino acids	131.2	C6H13NO2	73-32-5	6.45654e+06	1.98601e+07	1.91215e+07	2.0691e+07	6.36025e+06	2.17378e+07	2.58078e+07	2.581e+07	8.39903e+06
POS_q283	L-Leucine	Amino acids	131.2	C6H13NO2	61-90-5	1.11412e+07	5.72112e+06	1.09146e+07	6.46755e+06	5.8611e+06	1.11448e+07	7.08375e+06	7.50497e+06	7.1946e+06
POS_q284	L-Lysine	Amino acids	146.1	C6H14N2O2	56-87-1	3.04885e+07	2.8627e+07	2.57353e+07	3.02328e+07	3.30588e+07	3.54291e+07	3.31176e+07	3.19457e+07	3.34449e+07
POS_q290	L-Proline	Amino acids	115.1	C5H9NO2	147-85-3	3.63241e+07	3.47247e+07	3.27434e+07	3.15295e+07	3.26026e+07	3.4168e+07	3.81065e+07	3.67424e+07	3.6504e+07
POS_q294	L-Valine	Amino acids	117.2	C5H11NO2	72-18-4	2.36838e+07	2.14565e+07	2.24494e+07	2.59145e+07	2.55443e+07	2.62937e+07	2.82825e+07	2.68697e+07	2.89733e+07
POS_q308	Methionine Sulfoxide	Amino acids	165.2	C5H11NO3S	62697-73-8	135346	161639	224897	247659	328598	314102	312359	324514	265349
POS_q331	N-Acetylornithine	Amino acids	174.2	C7H14N2O3	6205-08-09	432066	499312	538447	507376	83179.3	559132	611936	526306	513719
POS_q343	N-Methylsarcosine	Amino acids	103.1	C4H9NO2	1118-68-9	1.03319e+07	9.74283e+06	1.00999e+07	8.34513e+06	9.55683e+06	9.6898e+06	1.04054e+07	1.018e+07	1.07661e+07
POS_q400	Sarcosine	Amino acids	89.1	C3H7NO2	107-97-1	480782	397349	406288	341613	357363	368689	333043	337014	478858
POS_q456	Β-Alanine	Amino acids	89.1	C3H7NO2	107-95-9	119640	105608	133253	116202	117262	122322	141671	116761	130059
NEG_t1115	Butyl Methylcarbamate	Amino acids	131.2	C6H13NO2	5461-30-3	4823.7	4305.1	4018.58	5019.84	5156.04	4973.73	5382.28	5270.43	5375.9
NEG_t1200	D-Asparagine	Amino acids	132.1	C4H8N2O3	2058-58-4	10217.8	9820.42	9719.89	18941.3	19206.3	19143.2	16447.6	16231.4	16761.2
NEG_q80	α-D-Glucose	Sugars	180.2	C6H12O6	492-62-6	2.12707e+07	9.22118e+06	6.85685e+06	3.47193e+06	4.92554e+06	4.72124e+06	8.42871e+06	6.94095e+06	5.70104e+06
NEG_q119	D-Arabinose	Sugars	150.1	C5H10O5	10323-20-3	1.88018e+06	1.47373e+06	1.60083e+06	1.73331e+06	2.0838e+06	1.64403e+06	1.70833e+06	1.78099e+06	1.80062e+06
NEG_q120	D-Arabitol	Sugars	152.2	C5H12O5	488-82-4	337752	486257	357718	334763	292872	313095	405739	316261	421395
NEG_q122	D-Fructose	Sugars	180.2	C6H12O6	57-48-7	1.24251e+06	1.74045e+06	2.2194e+06	1.2996e+06	1.54462e+06	2.20077e+06	1.50878e+06	1.53643e+06	1.29217e+06
NEG_q125	D-Gluconic Acid	Sugars	196.2	C6H12O7	526-95-4	4.68147e+07	3.59895e+07	4.11706e+07	4.59494e+07	4.77537e+07	4.38993e+07	4.10384e+07	3.03945e+07	5.1887e+07
NEG_q126	D(+)-Glucose	Sugars	180.2	C6H12O6	50-99-7	3.50472e+06	3.17692e+06	4.39518e+06	3.07986e+06	2.82386e+06	3.36973e+06	3.91342e+06	3.32638e+06	3.27555e+06
NEG_q146	Dl-Xylose	Sugars	150.1	C5H10O5	25990-60-7	2.42663e+06	2.34324e+06	2.42218e+06	2.3112e+06	2.20646e+06	2.37201e+06	2.56736e+06	2.60842e+06	2.52608e+06
NEG_q148	D-(+)-Maltose Monohydrate	Sugars	360.3	C12H22011·H2O	6363-53-7	59943.7	46267	84778.2	10569.8	48927.7	48830.8	50766.8	49381.9	38489.9
NEG_q150	D-Mannitol	Sugars	182.2	C6H14O6	69-65-8	571057	585039	509319	431322	424344	469834	775423	497311	483058
NEG_q152	D-Mannose	Sugars	180.2	C6H12O6	3458-28-4	5.29848e+06	4.79462e+06	5.0571e+06	4.27535e+06	4.22808e+06	4.18216e+06	4.61627e+06	4.91249e+06	4.42957e+06
NEG_q153	D-(+)-Melezitose	Sugars	504.4	C18H32O16	597-12-6	44392.9	44826.9	46412	32409.6	27933.2	53795.2	24954.6	44741.4	43179.3
NEG_q154	D-Melibiose	Sugars	342.3	C12H22O11	585-99-9	495756	553941	563685	330147	272732	337219	275259	279138	345387
NEG_q160	D-Sorbitol	Sugars	182.2	C6H14O6	50-70-4	667777	675167	648939	514904	500722	535228	1.04561e+06	593278	608614
NEG_q161	D-Tagatose	Sugars	180.2	C6H12O6	87-81-0	1.86258e+06	2.74831e+06	2.16659e+06	1.65128e+06	1.12875e+06	1.3068e+06	1.4111e+06	1.54662e+06	4.01341e+06
NEG_q163	Dulcite	Sugars	182.2	C6H14O6	608-66-2	676851	761169	767925	614846	603549	613726	985584	751881	660224
NEG_q175	(-)-Fucose	Sugars	164.2	C6H12O5	2438-80-4	2.77842e+06	8.79821e+06	5.58191e+06	5.51799e+06	2.01591e+06	3.02554e+06	1.038e+07	9.28856e+06	8.9191e+06
NEG_q230	L(+)-Arabinose	Sugars	150.1	C5H10O5	87-72-9	799069	767545	784508	647284	681763	689355	817955	786251	666106
NEG_q233	L-Glucose	Sugars	180.2	C6H12O6	921-60-8	1.10715e+07	1.53056e+07	1.60018e+07	1.25108e+07	1.26303e+07	1.31299e+07	1.55089e+07	1.31257e+07	1.35405e+07
NEG_q241	L-Tartaric Acid	Sugars	150.1	C4H6O6	87-69-4	588311	600090	667834	676630	637540	204110	225392	227377	228815
NEG_q246	L-Xylose	Sugars	150.1	C5H10O5	609-06-3	1.99876e+06	1.79731e+06	2.16742e+06	1.8307e+06	1.97905e+06	1.67013e+06	2.05778e+06	2.09514e+06	1.87454e+06
NEG_q251	Maltose	Sugars	342.3	C12H22O11	69-79-4	42288.5	76216.3	82275.4	59521.5	27486.4	36837.2	46616.7	27445.1	31461.4
NEG_q254	Mannose	Sugars	180.2	C6H12O6	530-26-7	453458	448876	508737	578002	537784	650305	647858	563353	628972
NEG_q349	Sucrose	Sugars	342.3	C12H22O11	57-50-1	766128	830546	755700	400581	430381	466921	547722	439804	391594
NEG_q386	γ-Cyclodextrin	Sugars	1297.1	C48H80O40	17465-86-0	1432.78	808.202	2400.96	319.299	4487.71	1409.75	1400.02	1052.37	3626.56
POS_q6	1-Kestose	Sugars	504.4	C18H32O16	470-69-9	1789.15	44012.1	897.492	10848.8	8386.45	13912.2	4729.2	3634.4	10.0018
POS_q154	D-(+)-Cellobiose	Sugars	342.3	C12H22O11	528-50-7	23351.5	7679.27	3838.52	4876.08	9358.67	27797.5	1391.52	10.0018	4955.47
POS_q162	D-Galactose	Sugars	180.2	C6H12O6	59-23-4	2.52178e+06	2.79613e+06	1.94999e+06	1.55846e+06	1.61414e+06	1.21474e+06	1.97459e+06	1.88704e+06	1.68274e+06
POS_q163	D-Glucosamic Acid	Sugars	195.2	C6H13NO6	3646-68-2	28877.1	20867.3	25481.2	24446.5	21198.3	37339.2	12845.5	15227.9	14894
POS_q180	D-Panose	Sugars	504.4	C18H32O16	33401-87-5	1374.8	7349.75	1789.08	9972.88	897.228	7249.34	9067.84	19859.9	1815.52
POS_q257	Lactitol	Sugars	344.3	C12H24O11	585-86-4	34839.7	38276	36809.3	44304.2	38172	37804	35707.8	12476.6	18845.9
POS_q258	Lactulose	Sugars	342.3	C12H22O11	4618-18-2	46462.8	41513.9	64563	28544.9	31203.5	21848.1	18448.7	56232.6	29368.7
POS_q299	Maltotriose	Sugars	504.4	C18H32O16	1109-28-0	10832.4	11849	11708.4	3633	11814.2	5377.73	3550.63	20138.5	14160.4
POS_q301	Manninotriose	Sugars	504.4	C18H32O16	13382-86-0	2779.88	5938.9	16720.7	3588.91	3721.19	8079.79	15394.1	4606.5	12008.1
NEG_t175	4,6-Dideoxysucrose	Sugars	310.3	C12H22O9	118650-57-0	834.961	842.306	779.391	686.573	731.187	687.963	753.65	740.324	766.999
POS_t79	Palatinose	Sugars	342.3	C12H22O11	13718-94-0	1757.9	1723	1655.24	1288.25	1220.99	1241.05	1135.91	1111.84	1060.33
NEG_q48	4-Ethylphenol	Polyphenols	122.2	C8H10O	123-07-9	74997.5	67698	71397	77162.6	102616	72253.9	109710	80844	154036
NEG_q169	Ethylparaben	Polyphenols	166.2	C9H10O3	120-47-8	1842.53	10.0018	10.0018	5738.74	3297.55	1286.03	5051.98	10.0018	11506.2
NEG_q178	Gallic Acid	Polyphenols	170.1	C7H6O5	149-91-7	9.42166e+07	5.31052e+07	5.12133e+07	3.87579e+07	3.33274e+07	3.27521e+07	4.08926e+07	4.39221e+07	3.942e+07
NEG_q259	Methyl 4-Hydroxyphenylacetate	Polyphenols	166.2	C9H10O3	14199-15-6	4.30474e+06	3.96484e+06	3.85327e+06	3.13618e+06	2.84379e+06	3.24222e+06	3.5117e+06	3.8166e+06	3.30576e+06
NEG_q262	Methyl Gallate	Polyphenols	184.2	C8H8O5	99-24-1	4.83822e+06	8.20795e+06	5.96216e+06	7.37584e+06	7.17917e+06	7.62136e+06	6.06575e+06	6.19129e+06	6.02867e+06
NEG_q266	Methyl Paraben	Polyphenols	152.2	C8H8O3	99-76-3	325767	286052	316815	336511	349014	330807	408533	373048	456140
NEG_q291	Olivetol	Polyphenols	180.2	C11H16O2	500-66-3	1.47444e+07	2.50918e+07	2.34047e+07	1.8548e+07	1.96465e+07	1.49547e+07	1.90802e+07	2.10881e+07	1.85324e+07
NEG_q318	Pyrocatechuic Acid	Polyphenols	154.1	C7H6O4	303-38-8	8.28037e+06	5.94345e+06	7.82521e+06	7.63668e+06	8.81625e+06	8.27087e+06	8.93031e+06	9.56233e+06	1.04277e+07
NEG_q319	Pyrogallol	Polyphenols	126.1	C6H6O3	87-66-1	2.52875e+06	5.03012e+06	4.81076e+06	3.57594e+06	3.15707e+06	3.1606e+06	3.97912e+06	4.05736e+06	3.59775e+06
NEG_q324	Raspberry Ketone	Polyphenols	164.2	C10H12O2	5471-51-2	8.80702e+06	1.48856e+07	1.50434e+07	6.68579e+06	9.41828e+06	8.16874e+06	1.07402e+07	1.13359e+07	8.04677e+06
NEG_q336	Salicin	Polyphenols	286.3	C13H18O7	138-52-3	24439.8	33307	39140.7	13278	12932.5	15846.9	18002	16751.2	18288
NEG_q337	Salicylic Acid	Polyphenols	138.1	C7H6O3	69-72-7	3.57764e+07	2.83257e+07	3.32199e+07	3.07435e+07	3.31444e+07	3.08339e+07	3.76616e+07	3.67782e+07	4.06722e+07
NEG_q363	Trans-Caffeic Acid	Polyphenols	180.2	C9H8O4	501-16-6	367206	209890	388080	324569	353308	286111	339935	424516	364807
POS_q39	3-Ethoxy-4-Hydroxybenzaldehyde	Polyphenols	166.1	C9H10O3	121-32-4	3.55826e+07	3.42061e+07	3.09003e+07	3.13106e+07	3.37557e+07	3.17897e+07	3.8358e+07	4.0387e+07	3.78194e+07
POS_q93	Aloin A	Polyphenols	418.4	C21H22O9	1415-73-2	3615.18	10.0018	2693.96	6087.35	4332.05	797.563	4364.43	10.0018	3185.28
POS_q210	Geraniin	Polyphenols	952.6	C41H28O27	60976-49-0	10.0018	10.0018	10.0018	10.0018	1287.49	10.0018	771.269	10.0018	10.0018
POS_q377	Puerol A	Polyphenols	298.3	C17H14O5	152784-32-2	10.0018	975.173	1328.63	2225.06	1441.01	7271.2	6243.42	2246.1	6505.82
POS_q455	Zingerone	Polyphenols	194.2	C11H14O3	122-48-5	5320	1523.72	10.0018	10.0018	10.0018	4020.69	1813.81	10.0018	2449.74
NEG_t1066	Theaflavic acid	Polyphenols	428.1	C21H16O10	30407-93-3	6975.23	7406.79	6825.1	6984.76	6686.39	6485.94	7500.39	7487.98	7738.16
POS_t193	Cassiaside B2	Polyphenols	920.8	C39H52O25	218155-40-9	1240.78	1239.87	1075.1	1425.02	1311.96	1329.96	1300.47	1239.18	1327.16
POS_t37	Zearalanone	Polyphenols	320.2	C18H24O5	5975-78-0	10798.8	10269.3	11054	8226.91	7823.38	8593.27	8755.29	9317.51	8755.86
NEG_q215	Isocytosine	Nucleotides	111.1	C4H5N3O	108-53-2	420065	696354	601295	691003	690761	711808	918620	802731	897799
NEG_q358	Thymine	Nucleotides	126.1	C5H6N2O2	65-71-4	3.80296e+07	4.65527e+07	4.20974e+07	3.33407e+07	3.32133e+07	3.03583e+07	3.66892e+07	3.87728e+07	3.76851e+07
NEG_q370	Uracil	Nucleotides	112.1	C4H4N2O2	66-22-8	32477.1	38375.3	53799.4	23839	26232.7	26458.6	48057.9	47698.9	38605.4
NEG_q372	Uridine	Nucleotides	244.2	C9H12N2O6	58-96-8	3.74958e+06	3.60271e+06	3.75561e+06	3.29886e+06	3.49816e+06	3.57836e+06	5.03188e+06	4.9806e+06	4.59387e+06
NEG_q374	Uridine 5'-Monophosphate	Nucleotides	324.2	C9H13N2O9P	58-97-9	5.71905e+06	4.80539e+06	6.82246e+06	8.33951e+06	6.18284e+06	8.1055e+06	8.05827e+06	8.02036e+06	7.63406e+06
POS_q7	1-Methyladenosine	Nucleotides	281.3	C11H15N5O4	15763-06-1	63532.5	87994.2	350971	120692	170987	250959	223842	174834	148656
POS_q56	5-Methylcytidine	Nucleotides	257.2	C10H15N3O5	2140-61-6	83993.9	2633.85	78478.1	61282.5	69853.8	82054.3	145788	214751	111101
POS_q58	5'-Methylthioadenosine	Nucleotides	297.3	C11H15N5O3S	2457-80-9	2.21339e+07	2.1958e+07	2.14192e+07	1.35014e+07	1.11233e+07	1.15248e+07	1.31744e+07	1.38156e+07	1.42068e+07
POS_q72	7-Methylguanine	Nucleotides	165.1	C6H7N5O	578-76-7	2.68594e+06	2.31017e+06	2267100	1.8403e+06	2.04515e+06	1892723	2.65595e+06	2.39315e+06	2.51891e+06
POS_q83	Adenine	Nucleotides	135.1	C5H5N5	73-24-5	2.48816e+07	2.63111e+07	2.79408e+07	2.93206e+07	3.33921e+07	2.92318e+07	3.694e+07	2.95381e+07	2.97037e+07
POS_q97	Ancitabine (Hydrochloride)	Nucleotides	261.7	C9H12ClN3O4	10212-25-6	83317.3	74524	82491.7	134002	97120.5	126036	161283	205140	117714
POS_q139	Citicoline (Sodium)	Nucleotides	512.3	C14H27N4NaO11P2	33818-15-4	44171.2	40184.4	64083.6	34904.6	36004.4	18272.7	22879.8	39099.2	24708.5
POS_q147	Crotonoside	Nucleotides	283.2	C10H13N5O5	1818-71-9	3.91795e+06	6.88341e+06	7.05654e+06	6.49378e+06	7.3875e+06	4.48059e+06	7.99008e+06	9.17126e+06	8.20704e+06
POS_q150	Cytosine	Nucleotides	111.1	C4H5N3O	71-30-7	7.42698e+06	7.75327e+06	9.46195e+06	9.03276e+06	9.52031e+06	9.69087e+06	1.07966e+07	1.08715e+07	1.20142e+07
POS_q457	Β-Nicotinamide Mononucleotide	Nucleotides	334.2	C11H15N2O8P	1094-61-7	168292	238594	144684	182363	156437	223055	222472	215286	298737
NEG_t1131	Nicotinamide ribotide	Nucleotides	335.2	C11H16N2O8P+	75414-16-3	2134.41	2278.17	2204.87	2483.85	2651.54	2461.62	2767.7	2754.22	2732.94
NEG_t253	5’-Sulfamoyladenosine	Nucleotides	346.3	C10H14N6O6S	25030-31-3	4408.79	3572.93	3478.87	4245.54	3472.72	3766.52	3841.64	3527.42	3533.09
NEG_t273	5'-Phosphoribosylglycinamide	Nucleotides	286.2	C7H15N2O8P	10074-18-7	375.147	295.003	361.536	390.465	360.39	312.561	340.521	397.692	439.365
POS_q64	6-Methoxymellein	Coumarins	208.1	C11H12O4	13410-15-6	815251	609750	694904	903542	716439	834665	888509	939181	969351
NEG_t100	Praeroside VI	Coumarins	426.2	C20H26O10	--	11489.1	10525.5	10329.5	10357.1	11061.7	10426.4	9561.78	9538.52	9896.57
NEG_t878	Talacoumarin A	Coumarins	250.2	C13H14O5	2378400-78-1	419.233	328.058	356.756	172.31	203.939	211.919	133.364	151.415	132.713
NEG_t901	3,4-dihydrofusidienol A	Coumarins	302.3	C16H14O6	1202407-30-4	319.741	222.878	245.98	223.08	252.571	189.356	229.973	252.066	291.942
NEG_t913	Methylkhellactone	Coumarins	276.3	C15H16O5	20107-13-5	32669	52207.4	31990.6	34124.1	28776.4	29767.7	33841.2	34611.7	35388.7
NEG_t957	3'-Hydroxyxanthyletin	Coumarins	244.2	C14H12O4	165900-08-3	4920.14	14045.5	4687.5	5837.5	5475.92	5606.07	5621.86	5183.93	5508.63
NEG_q45	4,7-Dihydroxycoumarin	Coumarins	178.1	C9H6O4	1983-81-9	437737	425572	413727	359609	456842	359588	495127	281736	410141
NEG_q52	4-Methyldaphnetin	Coumarins	192.2	C10H8O4	2107-77-9	153460	99402.6	188099	116110	38147.5	78323.7	170514	122060	98896.5
NEG_q63	7-Hydroxycoumarin	Coumarins	162.1	C9H6O3	93-35-6	8.24909e+06	1.22847e+07	7.58453e+06	7.12428e+06	6.90167e+06	6.99753e+06	7.87195e+06	7.95883e+06	8.31806e+06
NEG_q79	Alloisoimperatorin	Coumarins	270.3	C16H14O4	35214-83-6	545.495	10.0018	885.726	949.764	459.444	476.426	1456.08	435.305	419.921
NEG_q84	Angelol G	Coumarins	376.4	C20H24O7	83199-38-6	1431.77	809.209	1468.48	10.0018	10.0018	3573.55	10.0018	1523.64	10.0018
NEG_q167	Erythrocentauric Acid	Coumarins	192.2	C10H8O4	90921-13-4	114944	138893	112188	116598	94450.5	108146	136530	157430	147729
NEG_q300	(+)-Peusedanol	Coumarins	264.3	C14H16O5	20516-23-8	69130.5	94053.1	123740	52024	55976.6	53443.7	82862.9	88628	86203
NEG_q357	Thunberginol C	Coumarins	272.3	C15H12O5	147517-06-4	2.04576e+07	1.98727e+07	1.91731e+07	1.77286e+07	1.57883e+07	1.40722e+07	2.31565e+07	2.04377e+07	2.14796e+07
POS_q120	Byakangelicin	Coumarins	334.3	C17H18O7	482-25-7	322.098	10.0018	4651.81	3148.29	1792.3	10.0018	2290.59	10.0018	2999.2
POS_q202	Ferulic Acid (Sodium)	Coumarins	216.2	C10H9NaO4	24276-84-4	23799.2	24590	25583	12744	14551	13882.3	7191.09	10.0018	10.0018
POS_q220	Herniarin	Coumarins	176.2	C10H8O3	531-59-9	2.71443e+06	1.74091e+06	3.15774e+06	2.37286e+06	1.78676e+06	2.11373e+06	2.25623e+06	2.29994e+06	1.9885e+06
POS_q303	Marmesin	Coumarins	246.3	C14H14O4	13710-70-8	102022	83784	102812	75552	79629.2	63260.6	60782	79311.6	44741.8
POS_q371	Praeruptorin B	Coumarins	426.5	C24H26O7	81740-07-0	10.0018	10.0018	694.811	349.717	10.0018	10.0018	10.0018	1051.36	10.0018
POS_q409	S-(+)-Marmesin	Coumarins	246.3	C14H14O4	13849-08-6	94080	81224	77214.7	64875.2	69223.2	29954.1	82190.7	65845.2	43170.9
NEG_q51	4'-Methoxyresveratrol	Steroids	242.3	C15H14O3	33626-08-3	13878.4	14644	12536	10.0018	10.0018	10.0018	47295	44768.7	48270
NEG_q290	Oleaside A	Steroids	516.3	C30H44O7	69686-84-6	10.0018	2705.07	326.51	924.159	1874.25	914.048	506.321	1702.21	10.0018
NEG_q309	Pinostilbene	Steroids	242.3	C15H14O3	42438-89-1	57893.5	34967.9	69950.4	28837.4	30066.8	33938.5	59284.7	28841.5	56417.4
NEG_q316	Pseudobufarenogin	Steroids	416.5	C24H32O6	17008-69-4	68493	45417.5	81473.7	30575.7	27841	30222	96363.9	26805.5	55917.4
POS_q167	Dihydroactinidiolide	Steroids	180.2	C11H16O2	17092-92-1	392435	466529	469801	423152	406512	481639	611063	573723	438222
POS_q191	Epibrassinolide	Steroids	480.7	C28H48O6	78821-43-9	10456.4	5491.13	10.0018	10.0018	9661.83	10.0018	10.0018	10.0018	4805.99
POS_q289	Loteprednol Etabonate	Steroids	466.9	C24H31ClO7	82034-46-6	1429.17	10.0018	3949.98	3720.72	10.0018	1554.22	10.0018	10.0018	1792.52
POS_q362	Physalin D	Steroids	544.2	C28H32O11	54980-22-2	53362.1	77949.8	56734.2	59740.6	57815.4	41080.6	49797.6	44901.8	78160.2
POS_q437	Triacetylresveratrol	Steroids	354.4	C20H18O6	42206-94-0	10.0018	760.506	627.541	1796.49	10.0018	1367.9	2589.37	1422.22	10.0018
NEG_t299	Chloromaloside C	Steroids	1165.3	C55H88O26	132998-89-1	17040.8	14675.2	11903.6	19787.6	22242.7	17823.4	18970.2	17989.5	21209.6
NEG_t382	Parispseudoside C	Steroids	1191.3	C57H90O26	1206707-59-6	36238.9	61161.2	44430.4	69091.1	70576.4	58687.4	61884.1	47530	64495.9
NEG_t447	Chinenoside I	Steroids	1037.2	C49H80O23	123941-66-2	18359.9	21976	21209.6	14073.9	13942	14074.5	15376	17467.8	15558.2
NEG_t470	Methyl protogracillin	Steroids	1078.5	C52H86O23	54522-53-1	5822.61	6219.99	6164.9	3659.3	4782.29	3952.8	6743.37	4092.43	3856.06
NEG_t776	Terrestrosin K	Steroids	1079.2	C51H82O24	193605-07-1	8543.66	8851.59	11364.6	6928.05	7957.53	6233.19	8010.82	6491.73	6902.61
NEG_t781	balanitin-2	Steroids	1017.2	C50H80O21	79975-20-5	5685.59	11988.2	3855.45	4726.68	5307.97	3580.09	4646.6	4025.42	4669.09
NEG_t83	α-Spinasterol glucoside	Steroids	574.8	C35H58O6	1745-36-4	600607	594042	584391	685790	755705	711211	632312	582613	598486
NEG_q5	1,4-Anthraquinone	Quinones	208.2	C14H8O2	635-12-1	4.05852e+06	1.32012e+07	1.46482e+07	1.30861e+07	1.22329e+07	1.28177e+07	1.4231e+07	1.58235e+07	7.7961e+06
NEG_q91	Aurantio-Obtusin Β-D-Glucoside	Quinones	492.4	C23H24O12	129025-96-3	108446	122824	138027	82365.2	50931.6	63658	68952.3	82899.7	59561.4
NEG_q111	Chrysophanol 8-O-Glucoside	Quinones	416.4	C21H20O9	13241-28-6	98352.9	76495.3	99885.6	61251.3	24999.8	45189.8	50620.8	44112.7	35012.9
NEG_q213	Isobarbaloin	Quinones	418.4	C21H22O9	5133-19-7	64135	75712.5	61397.3	50879.9	41033.1	45884.9	56736.3	50899.3	43225.7
NEG_q359	Thymoquinone	Quinones	164.2	C10H12O2	490-91-5	6.28616e+06	7.83342e+06	6.57477e+06	5.82412e+06	6.17813e+06	5.88508e+06	7.20494e+06	7.28602e+06	7.59797e+06
POS_q82	Acetylshikonin	Quinones	330.3	C18H18O6	24502-78-1	4417.32	10.0018	10509.3	10.0018	1141.07	1794.46	2160.81	883.538	10.0018
POS_q90	Alizarin 2-Methyl Ether	Quinones	254.1	C15H10O4	6003-11-08	994300	485501	897902	647798	289903	923614	651538	631080	468033
POS_q135	Chrysoobtusin	Quinones	358.3	C19H18O7	70588-06-6	57433.3	113567	129346	43549.7	87130	67386	83886.2	43611.5	93236.6
POS_q189	Emodin Anthrone	Quinones	256.2	C15H12O4	491-60-1	12499.8	5347.01	1275.06	10887.2	9593.67	8768.33	3551.69	5389.31	894.539
NEG_t1012	Galpinon	Quinones	560.5	C33H20O9	61774-50-3	38061.5	50335.1	43663.7	35353.4	30692.9	26407	29739.3	27680.4	30071.3
NEG_t277	Canarione	Quinones	272.2	C14H8O6	62681-86-1	4653.13	4484.87	4577.06	4818.27	4862.45	4060.24	4134.95	4317.62	4330.88
NEG_t309	batocanone	Quinones	390.3	C22H14O7	75423-05-1	1584.22	1535.18	1520.44	994.263	727.391	740.397	845.494	926.234	782.691
NEG_t354	Purpurquinone C	Quinones	400.4	C21H20O8	1333907-62-2	403.024	402.576	483.684	586.763	788.148	567.174	529.362	426.596	1063.01
NEG_t847	Ventilatone A	Quinones	312.3	C17H12O6	99933-36-5	6087.46	5769.2	7272.39	9034.55	7583.53	8047.68	7786.41	6702.05	14903.7
POS_t185	Torososide A	Quinones	728.7	C38H32O15	165689-32-7	5290.92	5650.9	5646.82	3648.33	3183.2	3081.42	3789.9	4021.9	3767.21
POS_t388	Capiquinone A	Quinones	376.6	C24H40O3	130866-42-1	7846.92	9896.59	9750.91	11202.8	11139.2	11513.2	10509.2	10448.1	10311.4
POS_t854	3(4H)-Quinolinone(9CI)	Quinones	145.2	C9H7NO	655239-54-6	34155.7	34734.3	29417.4	30733.2	27528.7	28316.2	33436.3	34733.4	33843.9
POS_t857	4-Hydroxy-8-methylquinoline	Quinones	159.2	C10H9NO	23432-44-2	451.443	489.37	406.537	431.387	408.416	386.035	458.468	451.795	493.01
POS_t887	Solorinic acid	Quinones	384.4	C21H20O7	10210-21-6	134.619	151.491	125.9	10.0018	10.0018	103.135	136.817	140.163	108.668
NEG_q85	Angeloylgomisin Q	Lignans	530.6	C29H38O9	72561-28-5	265.972	267.081	368.637	328.601	784.939	1247.5	1254.41	1105.9	10.0018
NEG_q308	Pinoresinol	Lignans	358.4	C20H22O6	487-36-5	129408	108698	68822.9	80227.2	94299	113173	97440.2	134790	135573
NEG_q351	Syringaresinol	Lignans	418.4	C22H26O8	487-35-4	112030	66296.2	131379	73431.2	50568.4	100816	163138	105816	121749
POS_q43	4'-Demethylpodophyllotoxin	Lignans	400.4	C21H20O8	40505-27-9	79077.2	110522	87783	85549.3	77022	89283	65942	83844.1	49730
POS_q334	Neoanhydropodophyllol	Lignans	400.4	C22H24O7	62287-47-2	2947.96	19441.4	11028.9	8835.51	8346.31	5301.66	10287	17674.3	2648.91
POS_q355	Paulownin	Lignans	370.4	C20H18O7	13040-46-5	765.465	10.0018	10.0018	2786.53	1952.98	3721.99	976.077	10.0018	10.0018
POS_q370	Podophyllotoxone	Lignans	412.4	C22H20O8	477-49-6	281.739	864.802	6733.38	10.0018	6118.2	2786.57	324.513	10.0018	10.0018
POS_q431	Tracheloside	Lignans	550.5	C27H34O12	33464-71-0	4445.75	2201.33	10.0018	10.0018	10.0018	6064.28	1141.43	2187.4	364.269
NEG_t657	Kadangustin D	Lignans	606.2	C34H38O10	--	167017	352090	377664	360441	241880	328575	436710	549916	367410
POS_t254	Schisantherin E	Lignans	538.2	C30H34O9	64917-83-5	1787.67	1845.35	2115.14	1428.32	1121.38	1460.03	1615.82	1738.85	1581.92
NEG_q253	Mannitol	Alcohols	182.2	C6H14O6	87-78-5	560284	486335	589994	414221	411355	464585	772523	524592	525366
POS_q235	Inositol	Alcohols	180.1	C6H12O6	643-10-7	2.46604e+08	270295322	267049323	1.84882e+08	173199809	174295579	2.2988e+08	240900500	2.31265e+08
POS_q354	Palatinitol	Alcohols	344.3	C12H24O11	64519-82-0	18528.2	12849.2	32753.6	29418.2	13738.8	5221.61	17089.9	23509.9	26325.2
NEG_t296	N-methoxy septorinol	Alcohols	334.4	C17H22N2O5	146428-58-2	3840.54	4201.81	3457.96	3665.71	3594.84	3450.72	3539.33	3603.97	3903.23
NEG_t410	Punctaporonin B	Alcohols	252.3	C15H24O3	93697-36-0	5419.17	4600.77	5672.49	4829.22	4656.81	5535.96	5976.13	6618.92	5842.66
POS_t444	Teasterone	Alcohols	448.7	C28H48O4	92751-21-8	3935.61	3212.76	2925.37	3046.48	2319.31	2293.18	2253.46	2101.62	1545.34
POS_t770	Alpinolide peroxide	Alcohols	282.3	C15H22O5	103425-26-9	858.018	835.818	636.088	737.564	764.16	707.248	720.628	736.247	741.089
NEG_q61	6-Hydroxynicotinic Acid	Vitamins	139.1	C6H5NO3	5006-66-6	16313.5	18671	18840.4	34957.9	37530	32117	31789.8	22385	38766.6
POS_q390	Riboflavin	Vitamins	376.4	C17H20N4O6	83-88-5	948622	1.15848e+06	1.03685e+06	1.0593e+06	1.05759e+06	1.16701e+06	1.49643e+06	1.93052e+06	1.45221e+06
NEG_t233	5-Hydroxyflunixin	Vitamins	312.2	C14H11F3N2O3	75369-61-8	4848.52	4651.02	4778.88	6189.86	6248.72	5759.9	5726.49	5877.33	5667.46
POS_t812	Imazethapyr	Vitamins	289.3	C15H19N3O3	81335-77-5	1412.33	1162.97	1030.41	1357.97	1415.96	1277.85	1657.14	1690.46	1478.53
NEG_q193	Griffonilide	Others	168.2	C8H8O4	61371-55-9	78698.9	88993.4	83062.9	77072.3	73547	72239.1	69438	90096.5	63621.1
NEG_q247	Maduropeptin Chromophore	Others	778.2	C40H43ClN2O12	--	1140.14	10.0018	530.793	432.074	10.0018	887.992	288.154	565.912	2709.59
NEG_q249	Malic Acid 4-Me Ester	Others	148.1	C5H8O5	66178-02-7	2265.88	10.0018	1359.3	2723.55	1357.56	2263	1811.49	448.521	895.324
NEG_q257	Methyl 2-Furoate	Others	126.1	C6H6O3	611-13-2	1.57894e+07	1.02618e+07	1.0782e+07	9.82188e+06	1.18701e+07	9.8552e+06	1.15476e+07	1.15204e+07	1.27794e+07
NEG_q263	Methyl Isoferulate	Others	208.2	C11H12O4	16980-82-8	1.97824e+07	3.06359e+07	3.26252e+07	2.71627e+07	2.52117e+07	3.02834e+07	2.72489e+07	2.72506e+07	3.04139e+07
NEG_q296	Papain	Others	226.2	C9H14N4O3	9001-73-4	7.70239e+06	6.99693e+06	7.51229e+06	8.38063e+06	8.46656e+06	1.01585e+07	1.11708e+07	1.07634e+07	1.14597e+07
POS_q108	Benzofuran	Others	118	C8H6O	271-89-6	4.73445e+06	367272	4.25935e+06	3.38395e+06	1.89152e+06	2.08627e+06	3.10807e+06	2609370	2.18639e+06
POS_q175	Dl-Methionine Methylsulfonium Chloride	Others	199.7	C6H14ClNO2S	3493-12-07	373279	318138	227693	259717	275630	281836	262059	195162	241135
NEG_t1110	Nuarimol	Others	314.7	C17H12ClFN2O	63284-71-9	711.295	616.955	647.248	553.722	597.88	583.312	683.848	706.181	696.551
NEG_t245	Potassium alginate	Others	398.3	C14H22O13	9005-36-1	2271.96	2179.17	2245.52	2460.42	2616.4	2291.8	2544.25	2341.15	2492.92
NEG_t266	paratunamide A	Others	562.6	C27H34N2O11	914778-23-7	130682	127692	126257	122598	124852	115733	122332	122956	133141
NEG_t334	Senkyunolide G	Others	208.1	C12H16O3	94530-85-5	3110.6	2863.74	3056.04	3025.33	2890.46	3192.75	3481.27	3674.46	3637.53
NEG_t335	3,6-Dihydronicotinic acid	Others	207	C6H7NO2	3401-80-7	229.207	227.773	221.827	283.291	251.302	285.511	205.097	198.136	208.75
NEG_t477	Oligomycin E	Others	821	C45H72O13	110231-34-0	1.58007e+06	1.5703e+06	1.82615e+06	1.59908e+06	1.4658e+06	1.58805e+06	1.77538e+06	2.0287e+06	1.77215e+06
NEG_t567	Tetracosadiene	Others	334.6	C24H46	75081-20-8	261.293	364.665	455.316	10.0018	196.178	245.713	143.382	226.137	157.289
NEG_t968	Ranunculin	Others	276.2	C11H16O8	644-69-9	2604.08	1830.79	2089.92	2165.38	2693.51	2388.54	2285.01	2537.55	2516.04
POS_t158	Dermadin	Others	179.2	C9H9NO3	12698-52-1	158.68	170.748	148.429	152.19	121.586	131.145	138.174	143.238	147.997
POS_t163	Chiratanin	Others	590.5	C30H22O13	109237-38-9	4107.16	4542.55	4465.87	3290.75	2777.49	2780.88	3005.58	3185.32	2836.1
POS_t236	Jasminoside E	Others	330.2	C16H26O7	--	2832.64	2836.45	2697.08	3345.53	2764.36	3462.75	3377.98	3882.82	3212.14
POS_t263	1-Tridecene	Others	182.3	C13H26	2437-56-1	251.508	228.839	447.64	177.541	137.618	176.788	244.091	254.594	243.376
POS_t525	4-Ethylcyclohexene	Others	110.2	C8H14	3742-42-5	913.455	851.226	792.79	694.125	765.812	735.756	888.695	883.573	811.599
POS_t535	Isopentenyl phosphate	Others	148.1	C5H11O4P	4936-73-6	9004.73	8952.71	10465.8	11165.4	11336.6	12216.2	9459.02	12431.7	12262.8
POS_t646	Variolaric acid	Others	314.2	C16H10O7	490-34-6	1248.74	946.301	1093.93	987.515	1051.52	1067.5	1177.72	1436.3	1206.53
POS_t667	1-Indanone	Others	132.1	C9H8O	83-33-0	4054.42	4149.62	3747.54	3713.13	3338.88	3542.29	3675.96	3847.31	3692.72

## Sheet:  Table S2
Table S2. Sequence abundance and length of bacteria and fungi in XYBT sample.
Sample ID	Bacteria					Fungi
	Raw Reads	Clean Reads	Effective Tags	Effective Ratio (%)	Average Length (bp)	Raw Reads	Clean Reads	Effective Tags	Effective Ratio (%)	Average Length (bp)
F0-1	79694	79675	60228	75.57	315	102897	101618	94839	92.17	276
F0-2	75844	75832	59385	78.3	313	133150	132749	124961	93.85	249
F0-3	87058	87039	68584	78.78	347	117039	116674	109303	93.39	250
F2-1	81531	81509	61303	75.19	301	104022	103710	98202	94.41	230
F2-2	81660	81637	64404	78.87	313	97768	97702	91871	93.97	288
F2-3	86840	86814	68913	79.36	309	125204	124982	117705	94.01	258
F4-1	84380	84354	66316	78.59	317	106567	106435	100055	93.89	256
F4-2	85177	85157	69771	81.91	302	122174	121729	115516	94.55	244
F4-3	72046	72031	61209	84.96	318	123536	123438	116264	94.11	260
